# Supplementary material for: Retrospective cohort analysis of real-life decisions about end-of-life care preferences in a Southeast Asian country
Source: PubMed Central journal article supplement — BMJ Open. 2019 Feb 3;9(2):e024662. doi: 10.1136/bmjopen-2018-024662 (PMC6367977; doi:10.1136/bmjopen-2018-024662), 2019-02-03
Supplement: bmjopen-2018-024662.draft_revisions.pdf [file bmjopen-2018-024662.draft_revisions.pdf]

# BMJ Open

BMJ Open is committed to open peer review. As part of this commitment we make the peer review history of every article we publish publicly available.

When an article is published we post the peer reviewers' comments and the authors' responses online. We also post the versions of the paper that were used during peer review. These are the versions that the peer review comments apply to.

The versions of the paper that follow are the versions that were submitted during the peer review process. They are not the versions of record or the final published versions. They should not be cited or distributed as the published version of this manuscript.

BMJ Open is an open access journal and the full, final, typeset and author-corrected version of record of the manuscript is available on our site with no access controls, subscription charges or pay-per-view fees (<http://bmjopen.bmj.com>).

If you have any questions on BMJ Open's open peer review process please email [editorial.bmjopen@bmj.com](mailto:editorial.bmjopen@bmj.com)

# BMJ Open

## A cross-sectional profile of real-life decisions about end-of-life care preferences in a Southeast Asian country

|                               |                                                                                                                                                                                                                                                                                                                                                                                                                                                                                                                                      |
|-------------------------------|--------------------------------------------------------------------------------------------------------------------------------------------------------------------------------------------------------------------------------------------------------------------------------------------------------------------------------------------------------------------------------------------------------------------------------------------------------------------------------------------------------------------------------------|
| Journal:                      | <i>BMJ Open</i>                                                                                                                                                                                                                                                                                                                                                                                                                                                                                                                      |
| Manuscript ID                 | bmjopen-2018-024662                                                                                                                                                                                                                                                                                                                                                                                                                                                                                                                  |
| Article Type:                 | Research                                                                                                                                                                                                                                                                                                                                                                                                                                                                                                                             |
| Date Submitted by the Author: | 08-Jun-2018                                                                                                                                                                                                                                                                                                                                                                                                                                                                                                                          |
| Complete List of Authors:     | Tan, Woan Shin; National Healthcare Group, Health Services& Outcomes Research; National Healthcare Group<br>Bajpai, Ram; Lee Kong Chian School of Medicine<br>Ho, Andy H Y; Nanyang Technological University, Psychology<br>Low, Chan Kee; Nanyang Technological University<br>Car, Josip; Nanyang Technological University, Health Services and Outcomes Research Programme, Lee Kong Chian School of Medicine; Imperial College London, Global eHealth Unit, Department of Primary Care and Public Health, School of Public Health |
| Keywords:                     | advance care planning, patient preferences, place of care, place of death, cross sectional study                                                                                                                                                                                                                                                                                                                                                                                                                                     |
|                               |                                                                                                                                                                                                                                                                                                                                                                                                                                                                                                                                      |

SCHOLARONE™  
Manuscripts

1  
2  
3 **A cross-sectional profile of real-life decisions about end-of-life care preferences in a**  
4  
5 **Southeast Asian country**  
6  
7  
8  
9

10 Woan Shin Tan<sup>1,2,3</sup>, Ram Bajpai<sup>1</sup>, Andy Hau Yan Ho<sup>1,4,5</sup>, Chan Kee Low<sup>6</sup>, Josip Car<sup>1,7</sup>  
11  
12  
13

14 <sup>1</sup>Centre for Population Health Sciences, Lee Kong Chian School of Medicine, Nanyang  
15 Technological University, Singapore  
16  
17

18 <sup>2</sup>NTU Institute for Health Technologies (NTU HealthTech), Interdisciplinary Graduate  
19 School, Nanyang Technological University, Singapore  
20  
21

22 <sup>3</sup>Health Services and Outcomes Research Department, National Healthcare Group,  
23 Singapore  
24  
25  
26

27 <sup>4</sup>Psychology Programme, School of Social Sciences, Nanyang Technological University,  
28 Singapore  
29  
30  
31

32 <sup>5</sup>Palliative Care Centre for Excellence in Research and Education, Singapore  
33  
34

35 <sup>6</sup>Economics Programme, School of Social Sciences, Nanyang Technological University,  
36 Singapore  
37  
38

39 <sup>7</sup>Global eHealth Unit, Department of Primary Care and Public Health, School of Public  
40 Health, Imperial College London, U.K.  
41  
42  
43  
44  
45  
46

47 Corresponding Author:  
48

49 Woan Shin Tan, Centre for Population Health Sciences, Nanyang Technological  
50 University, Clinical Sciences Building, 11 Mandalay Road, Singapore 308232  
51  
52

53 Email: [woan\\_shin\\_tan@nhg.com.sg](mailto:woan_shin_tan@nhg.com.sg)  
54  
55  
56  
57

1  
2  
3 Figures: 0

4  
5 Tables: 5

6  
7 References: 53

8  
9  
10 Word count: 3,445

11  
12  
13  
14  
15 **ABSTRACT**

16  
17 **Objective** To describe the end-of-life care preferences of individuals who have formally  
18 completed their advance care plans (ACP), and to examine the influence of age and  
19 gender on these preferences.  
20  
21  
22

23  
24  
25  
26 **Design, setting, and participants** A cross-sectional study was conducted to profile the  
27 end-of-life care preferences. Participants included all adults ( $\geq 21$  years old) ( $n=3,380$ )  
28 who had completed a statement of their preferences as part of a national ACP programme  
29 in Singapore. The study timeframe was between January 2011 and December 2015.  
30  
31  
32

33  
34  
35  
36  
37 **Main Measures** End-of-life care preferences were obtained from the ACP document.  
38 The extent of decisions differed based on one's health status (healthy, chronically ill, or  
39 diagnosed with advanced illnesses). To analyse the data, descriptive statistics and logistic  
40 regression analysis were used.  
41  
42  
43  
44  
45

46  
47  
48  
49 **Results** The median time between ACP documentation and death was 7.3 months (95%  
50 Confidence Interval: 6.35-8. Immediate family members formed the majority of  
51 nominated substitute decision makers. 18). Across healthy, and chronically ill patients,  
52  
53  
54  
55  
56

1  
2  
3 the majority did not opt for cardiopulmonary resuscitation (CPR) or other life-sustaining  
4 measures. Among individuals with advanced illnesses, 94% preferred not to attempt CPR  
5 but 69% still preferred to receive some form of active medical treatment. Approximately  
6 40% chose to be cared for, and to die at home. We found that the preferred place of care  
7 is related to but not synonymous with the place of death. Age and sex significantly  
8 predict preferences in those with advanced illnesses.  
9  
10  
11  
12  
13  
14  
15

16  
17  
18  
19 **Conclusion** This study presented a comprehensive overview of end-of-life care  
20 preferences in this Singaporean sample. Most individuals preferred to not proceed with  
21 life-sustaining treatments. However, among those with advanced illnesses, there was still  
22 a strong preference to receive some form of limited treatment. Better understanding of  
23 end-of-life care preferences through ACP can better guide end-of-life care programme  
24 planning, and resource allocation decisions.  
25  
26  
27  
28  
29  
30  
31  
32  
33  
34

35 **Keywords** advance care planning; patient preferences; place of care; place of death; cross  
36 sectional studies  
37  
38  
39  
40  
41

## 42 **ARTICLE SUMMARY**

### 43 **Strengths and limitations of this study**

- 44 • Large sample size that spanned across seven acute care hospitals, and twelve different  
45 social care providers in Singapore.
- 46 • Profiled the demographics and end-of-life care preferences decided under real-life  
47 situations  
48  
49  
50  
51  
52  
53  
54  
55  
56  
57

- Amongst individuals diagnosed with advance illnesses, this study examined the relationship between preferences for place of care and place of death
- Amongst individuals diagnosed with advance illnesses, this study examined the association between end-of-life care preferences and age as well as sex
- Most the ACPs were conducted in acute care settings, and the results may not be generalisable to other populations.

## INTRODUCTION

Most societies with a rapidly ageing population would encounter challenges in providing high quality end-of-life care. In many jurisdictions, an individual could designate a health care decision-maker, and specify decisions regarding life-sustaining treatments in the event of decisional incapacitation, in a legally binding advance directive (AD). In 1991, the Patient Self-Determination Act (PSDA) was enacted in the US, by requiring healthcare institutions to provide information to adult patients about advance health care directives, upon admission to a healthcare facility (1). Since then, other countries have joined the movement to empower patients by introducing legislation.

In 1996, the Advance Medical Directive Act was passed in Singapore to safeguard individuals' treatment preferences to forgo extraordinary life-sustaining treatment (2). An individual can opt to sign an advance medical directive to indicate to one's doctor about his/her wishes with regards to the use of life-sustaining treatment in the event of terminal illness and impending death. Out of the 3.9 million resident population (3), only 24,682 individuals have completed an AD between 1997 and 2015, of which only ten were

1  
2  
3 effected (4). International research has cited legal formalities (5, 6) and low public  
4 awareness (7) as impediments towards the completion of advance (medical) directives (8,  
5  
6  
7  
8 9).

10  
11  
12 Due to the shortcomings of setting limits on medical care based on legal means (5), there  
13 has been a shift in policy focus towards supporting ongoing communications about end-  
14 of-life preferences between involved parties (6) in inpatient, as well as outpatient and  
15 community settings (1, 5). Effective communication has been identified as key in  
16 improving surrogate accuracy regarding end-of-life care (10), and increasing the level of  
17 concordance between received and preferred care (11). By promoting discussions  
18 between patients, their loved ones and healthcare professionals, advance care planning  
19 (ACP) is thought to better support communication and to align services received by the  
20 individuals, with their objectives of their care and their personal preferences (12) (12)  
21  
22  
23  
24  
25  
26  
27  
28  
29  
30  
31  
32  
33  
34

35 Research has found ACP to empower patients with a greater peace of mind (13), improve  
36 the level of agreement with regards to end-of-life care between patient and surrogate,  
37 reduce decisional conflict (14) and improve their satisfaction with care (15). The  
38 likelihood of dying at their preferred place was also higher among individuals who had  
39 completed an ACP (16); the transition between acute and terminal care is often smoother  
40 (17) with earlier referrals to community-based palliative care. ACP was associated with  
41 avoiding or reducing unnecessary life-sustaining treatments (13, 16), increasing the  
42 incidence of out-of-hospital and out-of-intensive care, and increasing the probability of  
43 dying at home (18-21).  
44  
45  
46  
47  
48  
49  
50  
51  
52  
53  
54  
55  
56  
57  
58  
59  
60

1  
2  
3 With this perspective, the Singapore government launched a comprehensive national  
4 ACP programme, “Living Matters”, in 2011. “Living Matters” is based on the Respecting  
5 Choices® programme at the Gunderson Health System in Wisconsin, US. Primarily, the  
6 programme aims to systematise the elicitation and documentation of medical and care  
7 preferences (22); with a longer-term goal of normalising death and dying conversations in  
8 the community (23, 24). Listed amongst populations that are ageing most rapidly in the  
9 world, this is a timely effort, as the need to cater for health care, including end-of-life  
10 care of the population, is expected to intensify alongside the doubling of the elderly  
11 population (25). The ACP programme was launched under the leadership of the Agency  
12 for Integrated Care, an independent corporate entity under the purview of the MOH  
13 Holdings. In the first phase of the programme implementation, ACP was initiated in  
14 public acute care hospitals and specialist care centres. In 2017, AIC shifted the  
15 programme towards a public health stance by expanding the outreach and facilitation  
16 services to the community (24).

17  
18  
19  
20  
21  
22  
23  
24  
25  
26  
27  
28  
29  
30  
31  
32  
33  
34  
35  
36  
37  
38 Research has been conducted locally to profile the end-of-life care preferences across  
39 different patients and community-based samples (26-29). The data reported in these  
40 studies contained the individual responses of their attitudes and preferences, which may  
41 not accurately represent real-world decision-making when families or loved ones are also  
42 involved. Therefore, in this article, we review the demographics and end-of-life care  
43 preferences, as documented in an Advance Care Plan. Given that end-of-life care  
44 preferences could differ across different health states and over one’s life cycle (30),  
45  
46  
47  
48  
49  
50  
51  
52  
53  
54  
55  
56  
57  
58  
59  
60



1  
2  
3 preferences are profiled according to their health status. Additionally, we also examined  
4  
5 the effect of age and gender on stated preferences.  
6

## 7 8 **METHODOLOGY**

### 9 10 **Advance Care Planning programme**

11  
12 Similar to Respecting Choices®, “Living Matters” comprised three integrated  
13  
14 components: (1) provision of patient educational materials; (2) trained and certified ACP  
15  
16 facilitators who assist individuals with ACP; (3) development of an IT system to enable  
17  
18 easily storage, and retrieval of ACP forms (31, 32). The programme has adopted a staged  
19  
20 approach that considers a person’s state of health and allows ACP to be conducted in  
21  
22 phases across one’s life-time. The conversations can then be individualised based on  
23  
24 one’s health status, which is broadly categorised as healthy, diagnosed with complex  
25  
26 chronic illnesses or diagnosed with advanced illnesses.  
27  
28  
29

30  
31  
32  
33 Currently, referral to ACP is largely based on clinical judgement and the individual  
34  
35 patient’s readiness to discuss end-of-life care issues. In practice, a social care or health  
36  
37 care professional may facilitate a conversation between the patient, and his/her family  
38  
39 members to explore his/her values, beliefs and how this impacts preferences towards  
40  
41 medical care at the end-of-life. ACP is not legally binding in Singapore and therefore,  
42  
43 there is no need to engage a lawyer for its discussion or documentation (33). All  
44  
45 participating patients are encouraged to identify a substitute decision-maker (SDM), who  
46  
47 can make health care decisions on their behalf in the event of incapacitation. Different  
48  
49 questions and standardised forms apply to each of the three health states (healthy,  
50  
51 chronically ill, with advanced illness). End-of-life care preferences are documented in an  
52  
53  
54  
55  
56  
57  
58  
59  
60

1  
2  
3 IT system after obtaining the patient's concurrence that they accurately reflect their  
4  
5 decisions. These recorded preferences are accessible to different providers across the  
6  
7 acute care continuum.  
8  
9

### 10 **Study design and population**

11  
12 This is a cross-sectional study that included all individuals aged 21 years and above, who  
13  
14 have completed their ACP between January 2011 and December 2015 across all  
15  
16 participating acute care hospitals, specialist care centres, and social care providers in  
17  
18 Singapore.  
19  
20

21  
22  
23  
24 Ethics approval was obtained from the institutional review board of Nanyang  
25  
26 Technological University and Domain Specific Review Board of the National Healthcare  
27  
28 Group, Singapore. As this is a retrospective database study, written informed consent was  
29  
30 waived by both boards.  
31  
32

### 33 **Elicited preferences by health status**

34  
35  
36  
37 For healthy adults, they were asked about their preferences related to the goals of care  
38  
39 when the probability of recovery or survival is low. The choices provided were: "make  
40  
41 comfort the goal of my care and do not prolong my life in this condition" or "continue to  
42  
43 provide all necessary life-sustaining treatment until outcomes happen to me which I find  
44  
45 unacceptable".  
46  
47  
48

49  
50  
51 For individuals with chronic conditions, the wishes documented in an ACP form specifies  
52  
53 preferences about CPR during cardiac arrest, and decisions about treatment options if  
54  
55  
56  
57

1  
2  
3 they were to develop serious complications with (i) a low likelihood of survival, or (ii) a  
4 high likelihood of survival but might become immobile and unable to communicate, or  
5  
6 high likelihood of survival but might become immobile and unable to communicate, or  
7  
8 (iii) a high likelihood of survival but might suffer from permanent cognitive impairment.  
9

10 The choice categories include “all treatment I need to live as long as I can”, “stop all  
11 efforts to keep me alive, allow natural death to happen” and “unsure”.  
12  
13

14  
15  
16  
17 For individuals with advanced illnesses, they were asked about their CPR preferences,  
18 decisions related to medical intervention (comfort, limited additional interventions, full  
19 treatment), place of care, and place of death. Under the current programme, full treatment  
20 considers intubation, mechanical ventilation, and cardioversion. Medical management  
21 may also include transfer to intensive care if indicated. Limited additional interventions  
22 include comfort measures and may also include oral or intravenous medications. While  
23 non-invasive ventilation support is acceptable, endotracheal intubation or long-term life  
24 support measures, including admission to intensive care units are not. Comfort measures  
25 include reasonable measures made to offer food and fluids. Medications, oxygen and  
26 other measures may be used as needed for comfort, but it does not include intubation.  
27  
28  
29  
30  
31  
32  
33  
34  
35  
36  
37  
38  
39  
40  
41

42 For place of medical treatment or care, individuals could opt for the home, hospice,  
43 nursing home, hospital, a trial of treatment in their homes before considering transfer to a  
44 hospital or a hospice, and a trial of treatment in the hospice or nursing home before  
45 transfer to a hospital. The documentation also allowed the individual to indicate “no  
46 preferences” and “others”. For place of death, individuals are asked where they would  
47 wish to be if they were left with 2-3 days of life. They could opt for either the home,  
48  
49  
50  
51  
52  
53  
54  
55  
56  
57

1  
2  
3 hospital, hospice or nursing home, and two or more alternatives such as home or hospital,  
4  
5 and home or nursing home or hospital.  
6  
7  
8  
9

### 10 **Measures and data extraction**

11  
12 We extracted data on ACP participant profiles and preferences from the national ACP IT  
13  
14 system, and the Tan Tock Seng Hospital ACP database. There were three different forms,  
15  
16 general, disease specific, and the preferred plan of care (PPC) form, to cater to  
17  
18 individuals at different health stages (healthy, chronically ill, advanced illness). Data  
19  
20 fields related to the nomination of a substitute decision maker(s), preference about the  
21  
22 administration of CPR in the event of a cardiac arrest, and end-of-life care preferences  
23  
24 were extracted. In addition, for patients diagnosed with advanced illnesses, we extracted  
25  
26 their preferences for place of care and death as well.  
27  
28  
29  
30  
31  
32

33 To ascertain whether the individuals were deceased, the data was linked to death-related  
34  
35 data from the National Registry of Birth and Deaths. Every Singaporean resident is issued  
36  
37 with a NRIC number. For this study, a project unique identifying number (PUIN) was  
38  
39 generated for each NRIC by a third-party vendor, who was not involved in the analysis of  
40  
41 the data. The PUIN was then used to link data belonging to each individual person across  
42  
43 the datasets.  
44  
45  
46  
47  
48

### 49 **Data analysis**

50  
51 Descriptive statistics were used to characterise the sample and to summarise the data  
52  
53 related to end-of-life care preferences. To examine the independent effects of age and  
54  
55  
56  
57  
58  
59  
60

gender on end-of-life care preferences, logistic regression models were used. All statistical tests were conducted using Stata version 12 (34).

## RESULTS

A total of 3,380 completed ACP documents were captured in the databases, with approximately 90% completed in acute hospitals. The patient characteristics can be seen in Table 1. 60% of the patients were aged 75 years and above, and there was demographic variation across the three types of ACP, with younger age profiles for those who completed the general and disease-specific forms. Among all individuals who completed the ACP, 53.2% (1798/3380) were deceased as at 31 December 2015, with the highest share for PPC. The overall median time between ACP completion and death was 7.27 months (95% CI: 6.35-8.18); 63.2% completed ACP within three months prior to death, 52.9% within six months and 42.3% within 12 months.

**Table 1** Profile of individuals by type of ACP.

| Variable        |             | General            | Disease specific  | Preferred plan of care | Total                |
|-----------------|-------------|--------------------|-------------------|------------------------|----------------------|
| <b>Age</b>      | < 55 years  | 77 (11.9)          | 6 (12.2)          | 142 (5.3)              | 225 (6.7)            |
|                 | 55–64 years | 193 (29.9)         | 14 (28.6)         | 259 (9.6)              | 466 (13.8)           |
|                 | 65–74 years | 203 (31.4)         | 17 (34.7)         | 445 (16.6)             | 665 (19.7)           |
|                 | ≥ 75 years  | 173 (26.8)         | 12 (25.5)         | 1,839 (68.5)           | 2,024 (59.9)         |
| <b>Sex</b>      | Female      | 359 (55.6)         | 19 (38.8)         | 1,316 (49.0)           | 1,694 (50.1)         |
|                 | Male        | 265 (41.0)         | 28 (57.1)         | 1,335 (49.7)           | 1,628 (48.2)         |
|                 | Missing     | 22 (3.4)           | 2 (4.1)           | 34 (1.3)               | 58 (1.7)             |
| <b>Deceased</b> |             | 57 (8.8)           | 10 (20.4)         | 1,731 (64.5)           | 1,798 (53.2)         |
| <b>Total</b>    |             | <b>646 (100.0)</b> | <b>49 (100.0)</b> | <b>2,685 (100.0)</b>   | <b>3,380 (100.0)</b> |

## Documented preferences

Data related to preferences for end-of-life care are represented in Table 2. For healthy individuals who had completed the general ACP, 1 in 8 persons indicated a preference for life-sustaining treatment. For individuals who had completed the disease-specific form, close to 1 in 3 opted for CPR and life-sustaining treatment, even if the likelihood of surviving the complications of the illness were low or if they were to lose their ability to move around or communicate. However, only 16.3% opted for full treatment if they were to become mentally incapacitated because of their illness.

For individuals with advanced illnesses (Table 3), 5.7% opted for CPR and 5.1% opted for full medical intervention. The majority preferred the initiation of a limited trial of treatment, which would be continued with comfort measures if there was no clinical improvement. Approximately 43.6% of individuals preferred to receive treatment in their homes, but 77.4% of these individuals would consider being transferred to an acute hospital after a trial of care at home. Only 29.7% stated the hospital as their preferred site of care. For place of death, 40.4% preferred dying at home, and only 14.1% preferred the hospital. One highlight is that although only 4.1% did not state any preference or were unsure about the place of care, 23.0% of respondents did indicate their preferences with regards to the preferred place of death.

**Table 2** End-of-life care preferences in general and disease specific ACP forms.

| Documented preferences                                | N, %       |
|-------------------------------------------------------|------------|
| <b>General ACP (n = 646)</b>                          |            |
| Appointment substitute decision maker                 | 581 (89.9) |
| Comfort measures                                      | 560 (86.7) |
| Life-sustaining treatments                            | 79 (12.2)  |
| <b>Disease specific ACP (n = 49)</b>                  |            |
| Appointment 1 <sup>st</sup> substitute decision maker | 35 (71.4)  |
| Appointment 2 <sup>nd</sup> substitute decision maker | 15 (30.6)  |

| <b>Documented preferences</b>                                           | <b>N, %</b>  |
|-------------------------------------------------------------------------|--------------|
| Serious complication with low chance of survival                        |              |
| Full treatment                                                          | 16 (32.7)    |
| Stop treatment                                                          | 31 (63.3)    |
| Serious complication with loss of ability to move around or communicate |              |
| Full treatment                                                          | 15 (30.6)    |
| Stop treatment                                                          | 32 (65.3)    |
| Serious complication with mental incapacity                             |              |
| Full treatment                                                          | 8 (16.3)     |
| Stop treatment                                                          | 38 (77.6)    |
| Cardiopulmonary resuscitation                                           |              |
| Attempt                                                                 | 14 (28.6)    |
| Do not attempt                                                          | 19 (38.8)    |
| Do not attempt if doctor believes low survival chances                  | 14 (28.6)    |
| <b>Preferred plan of care (n = 2685)</b>                                |              |
| Appointment 1 <sup>st</sup> substitute decision maker                   | 2,526 (94.1) |
| Appointment 2 <sup>nd</sup> substitute decision maker                   | 1,357 (50.5) |
| Cardiopulmonary resuscitation                                           |              |
| Attempt                                                                 | 152 (5.7)    |
| Do not attempt                                                          | 2,511 (93.5) |
| Do not attempt if doctor believes low survival chances                  | 22 (0.8)     |
| Medical intervention                                                    |              |
| Full treatment                                                          | 138 (5.1)    |
| Limited additional interventions                                        | 1,851 (68.9) |
| Comfort measures only                                                   | 677 (25.2)   |
| Unsure                                                                  | 19 (0.7)     |
| Preferred place of medical treatment                                    |              |
| Home                                                                    | 265 (9.8)    |
| Hospital                                                                | 798 (29.7)   |
| Nursing home                                                            | 166 (6.2)    |
| Hospice                                                                 | 131 (4.9)    |
| Trial of treatment before consider transfer to hospital                 |              |
| Home                                                                    | 908 (33.8)   |
| Nursing home                                                            | 269 (10.0)   |
| Hospice                                                                 | 28 (1.0)     |
| Others (no preference, unsure)                                          | 110 (4.1)    |
| Missing                                                                 | 10 (0.4)     |
| Preferred place of death                                                |              |
| Patient's home                                                          | 1,084 (40.4) |
| Hospital                                                                | 379 (14.1)   |
| Nursing home                                                            | 160 (5.9)    |
| Hospice                                                                 | 156 (5.8)    |
| Home or hospital/nursing home/hospice                                   | 112 (4.2)    |
| Healthcare institution (hospital or nursing home or hospice)            | 177 (6.7)    |
| Others (no preference, unsure)                                          | 617 (23.0)   |

ACP: Advance Care Planning; CPR: Cardiopulmonary Resuscitation

### Relationship between patient and SDM

The share of individuals who had appointed a substitute decision-maker varied across the three types of ACP. The rates of nomination were, however, lower for those who completed the general and disease-specific plans. For the PPC, only 8% of individuals did not identify a substitute decision-maker (Table 3). From Table 4.4, 78% of individuals nominated their immediate family (spouse, children, grandchildren) to speak on their behalf if they were incapacitated. Only a small percentage nominated non-related persons. Most ACP discussions also took place in the acute care setting.

**Table 3** Relationship with substitute decision maker.

|                                             | General            | Disease specific  | Preferred plan of care | Total               |
|---------------------------------------------|--------------------|-------------------|------------------------|---------------------|
| Spouse                                      | 185 (28.6)         | 8 (16.3)          | 320 (11.9)             | 513 (15.2)          |
| Child, child-in-law, or grandchild          | 230 (35.6)         | 20 (40.8)         | 1869 (69.6)            | 2119 (62.7)         |
| Other relatives and friends                 | 136 (21.1)         | 2 (4.1)           | 266 (9.9)              | 404 (12.0)          |
| Others (including healthcare professionals) | 14 (2.2)           | 1 (2.0)           | 10 (0.4)               | 25 (0.7)            |
| Missing                                     | 81 (12.5)          | 18 (36.7)         | 220 (8.2)              | 319 (9.4)           |
| <b>Total</b>                                | <b>646 (100.0)</b> | <b>49 (100.0)</b> | <b>2685 (100.0)</b>    | <b>3380 (100.0)</b> |

### Relationship between preferred place of care and place of death

Table 4 assessed the relationship between place of care and place of death. The results indicated that there was a high level of agreement in preferences related to being cared for at home and dying at home. Other than this, the place of care is not synonymous with where they would like to die at. Close to 1 in 3 individuals who preferred the hospital as the location of care, had also opted for home as the place of death.



**Table 4** Preferred place of care and preferred place of death.

| Place of Death                        | Place of Care |          |         |              |                          |                        |         | Total |
|---------------------------------------|---------------|----------|---------|--------------|--------------------------|------------------------|---------|-------|
|                                       | Home          | Hospital | Hospice | Nursing home | Home to Hospital/Hospice | Hospice to NH/Hospital | Others* |       |
| Home                                  | 90.9          | 31.1     | 9.9     | 5.4          | 57.3                     | 12.1                   | 12.7    | 40.4  |
| Hospital                              | 0.8           | 30.3     | 0.0     | 1.2          | 9.7                      | 13.7                   | 2.7     | 14.1  |
| Hospice                               | 0.8           | 3.1      | 67.9    | 0.6          | 2.6                      | 3.3                    | 4.5     | 5.8   |
| Nursing home                          | 0.4           | 0.4      | 0.0     | 70.5         | 0.2                      | 12.1                   | 0.0     | 6.0   |
| Home or hospital/Nursing home/hospice | 1.9           | 3.5      | 1.5     | 0.0          | 8.0                      | 2.0                    | 2.7     | 4.4   |
| Healthcare institution                | 0.4           | 4.4      | 4.6     | 6.6          | 1.2                      | 30.3                   | 19.1    | 6.6   |
| Others*                               | 4.9           | 26.7     | 16.0    | 15.7         | 20.9                     | 26.7                   | 58.2    | 22.7  |

\*no preferences; unsure

### Relationship between treatment preferences and patient profile

As age and sex were not correlated with preferences for healthy and chronically ill individuals, the results were excluded. Table 5 illustrates the results from a logistic regression to assess the impact of age and sex on the preferences of those with advanced illnesses. Those aged 75 years and above were more likely to not opt for CPR and comfort measures, compared to younger individuals. Care at home or having a trial of care at home was the preferred option for the older age group. Similarly, older people exhibited a stronger likelihood of preferring to die at home. There were no significant gender differences in preferences for CPR. However, there was a higher likelihood of females opting for full treatment than comfort measures. This is also consistent with the

relatively lower odds of choosing home as the site of care and place of death, compared to males.

**Table 5** Multivariable logistic regression of preferences by age and sex with 2,685 subjects who had completed the PPC form.

| Preferred plan of care                      | Age $\geq 75$ vs. Age $< 75$ | Female vs. Male         |
|---------------------------------------------|------------------------------|-------------------------|
|                                             | Adjusted OR<br>(95% CI)      | Adjusted OR<br>(95% CI) |
| <b>CPR</b>                                  |                              |                         |
| Attempt vs. Do not attempt                  | 0.31 (0.18-0.54)             | 1.56 (0.87-2.79)        |
| <b>Medical intervention</b>                 |                              |                         |
| Treatment vs. Comfort measures              | 0.32 (0.17-0.62)             | 2.35 (1.18-4.68)        |
| <b>Preferred place of medical treatment</b> |                              |                         |
| Home & trial at home vs. Others             | 1.52 (1.23-1.89)             | 0.69 (0.57-0.84)        |
| <b>Preferred place of death</b>             |                              |                         |
| Home vs. Others                             | 1.29 (1.03-1.61)             | 0.70 (0.57-0.85)        |

Model includes variables: age and sex

CPR: Cardiopulmonary Resuscitation; OR: Odds Ratio; C.I.: Confidence Interval

## DISCUSSION

This is the first study to profile the end-of-life care preferences amongst individuals who had completed their advance care plan as part of the national ACP programme. ACP is, therefore, an important channel that supports the expression of one's preferences, and to minimise care that is not wished for.

In our study, most individuals nominated their family members to speak on their behalf if they were incapacitated, which is similar to what was observed in other studies (35). Among healthy and chronically ill patients, the majority did not opt for CPR or other life-sustaining measures. Among those with advanced illness, more than 90% preferred not to attempt CPR, but more than 70% still preferred to receive some form of active medical

1  
2  
3 treatment at the end-of-life, rather than comfort care. In this national sample,  
4  
5 approximately 4 in 10 chose to be cared for and to die at home. Other Singaporean  
6  
7 studies examined the preferences of nursing home residents (36) and those who received  
8  
9 care in a day care centre (28). These studies similarly found that while most individuals  
10  
11 did not opt for CPR, they did express a preference to receive some form of active  
12  
13 treatment (28, 36).  
14  
15  
16  
17  
18

19 In 2014, the Lien Foundation, a Singapore philanthropic house, commissioned a  
20  
21 community-based survey to determine the death attitudes and the level of awareness  
22  
23 about hospice and palliative care. The survey reported that 70% and 77% of the surveyed  
24  
25 individuals would prefer to be cared for, and to die at home respectively (29). Preferences  
26  
27 for medical treatment at home, and for home deaths were significantly lower in our  
28  
29 sample. Public opinions often do not coincide with the views of individuals who are close  
30  
31 to the end-of-life (37). The complexity of choices grows as death draws near (38) when  
32  
33 the individual or their families need to trade-off the place of death against other priorities,  
34  
35 such as pain and symptom management, and the physical, emotional and financial burden  
36  
37 that death at home may bring (39).  
38  
39  
40  
41  
42  
43

44 We also found that, although the preferred place of care and place of death are related,  
45  
46 they are not equivalent. While only a small percentage of individuals did not have strict  
47  
48 preferences about where they are being cared for, almost 1 in 4 individuals expressed that  
49  
50 they had no preferred place of death. Other studies have similarly indicated that these two  
51  
52 dimensions are not equivalent, although healthcare professionals may use them  
53  
54 interchangeably in practice (40).  
55  
56  
57  
58  
59  
60

1  
2  
3  
4  
5  
6 In our study, the time between ACP completion and death was 7.3 months. While there is  
7  
8 no objective optimal timing (41), this is relatively shorter than the median times (14 - 37  
9  
10 months) reported in literature (42, 43). Given that the discussion about preferences should  
11  
12 occur before physical or mental incapacitation, earlier initiation can be beneficial to the  
13  
14 patients. At the same time, it is important to strike a balance because conducting the ACP  
15  
16 conversation too early when preferences are still unstable (44) could lead to unrealistic  
17  
18 choices based on hypothesised scenarios (42). ACP initiation should take into account  
19  
20 patient and family receptivity, and ideally, precede major health deterioration that could  
21  
22 lead to decisional incapacitation (45). Different diseases have different pathways of  
23  
24 functional declines (46), which also needs to be considered.  
25  
26  
27  
28  
29

30  
31 In our sample of patients with advanced illnesses, we found that age was positively  
32  
33 associated with preferences to withhold life-sustaining treatments, which was similar to  
34  
35 the findings of several studies (47, 48). We found that individuals older than 75 years  
36  
37 were more likely to opt for the home as the place of care and death; but other studies  
38  
39 reported that younger individuals more strongly prefer home as the place of care (49), or  
40  
41 that age did not have a significant effect (50). Cultural differences, in the meaning  
42  
43 assigned to the “home” as a place of care and death, or even the availability of alternative  
44  
45 palliative care facilities in different countries, could have resulted in the mixed evidence.  
46  
47  
48 For instance, due to the availability of inpatient palliative care units in Japan, older  
49  
50 individuals had stronger preferences for the patient palliative care unit as the site of care  
51  
52 than home (49). Our finding, that females were less likely to prefer to be cared for and  
53  
54  
55  
56  
57  
58  
59  
60

1  
2  
3 die at home, was similarly reported in other studies (51, 52). This could reflect the  
4  
5 general longer life expectancy of females compared to males. This reduced likelihood of  
6  
7 spousal support at the end-of-life could make home less preferred as an option (53).  
8  
9

### 12 **Policy & practice implications**

14 Currently, efforts to implement ACP are focused on the elderly and those with advanced  
15  
16 illnesses. Based on the numbers of completed disease-specific forms, the take-up by  
17  
18 chronically ill individuals is very low. While better integration of ACP with chronic  
19  
20 disease management efforts or more rapid expansion of ACP to the outpatient and  
21  
22 community settings could assist in improving coverage, additional resources would  
23  
24 concurrently be needed to assist hospitals to expand coverage to younger adults, and  
25  
26 brining ACP conversations forward in the life-cycle of an individual. Building  
27  
28 community awareness of, and acceptance towards ACP will be crucial.  
29  
30  
31  
32  
33  
34

35 Policies should also consider a range of perspectives and preferences, especially of sub-  
36  
37 populations that they will most immediately affect. Preferences elicited from surveys can  
38  
39 be viewed as an aspirational target that is achievable if practical barriers were eradicated.  
40  
41 Additionally, due to the relatively high proportion of individuals who still preferred  
42  
43 hospital as the location of care, policy-makers still need to focus on improving the end-  
44  
45 of-life care experience in formal healthcare institutions, while also expanding home  
46  
47 palliative care capacity to cater to those who preferred home as the first place of care, and  
48  
49 place of death.  
50  
51  
52  
53  
54  
55  
56  
57  
58  
59  
60

## Limitations

The sample comprised largely the patients receiving care in the acute care hospitals, and the results may not be generalisable for patients in the community care settings or to other individuals who have elected not to participate in ACP. Individuals who had completed the ACP documentation could be less death-avoidant, and therefore, have different preferences compared to others. Also, as data on ethnic groups and religions were largely absent, these were not reported in this manuscript.

## CONCLUSION

This study identified that most of the individuals in our sample, regardless of health status, preferred not to proceed with life-sustaining treatments across a spectrum of health scenarios. However, individuals with advanced illnesses still preferred to receive some form of active support, e.g. non-invasive ventilation support; or oral and intravenous drug administration. Our results imply that policies should consider not just home-based end-of-life care, but also actively focus on the quality of end-of-life care in hospitals, since many individuals still opt for them as the site of care.

## ETHICS AND DISSEMINATION

Ethics approval was obtained from the institutional review boards of Nanyang Technological University [Ref: IRB-2016-03-010] and the National Healthcare Group's Domain Specific Review Board [Ref: 2016/00739].

## ACKNOWLEDGEMENTS

1  
2  
3 We would like to thank Dr. Raymond Ng, Consultant, Department of Palliative Medicine,  
4 Tan Tock Seng Hospital for contributing data that were used in the analysis. We would  
5 also like to acknowledge Mr. Geronimo Jimenez, NTU; Dr. Sng Ming Keat, NTU; and  
6 other colleagues from the Agency for Integrated Care and the Ministry of Health for  
7 providing project support.  
8  
9  
10  
11  
12  
13  
14  
15  
16

### 17 **DATA ACCESS**

18  
19 The data that support the findings of this study are available from the Ministry of Health,  
20 but restrictions apply to the availability of these data, which were used under license for  
21 the current study, and so are not publicly available.  
22  
23  
24  
25  
26  
27

### 28 **AUTHOR CONTRIBUTION**

29  
30 Woan Shin Tan, and Bajpai Ram conceived and designed the study, obtained, analysed,  
31 interpreted the data, drafted and revised the article. Chan Kee Low, Andy Hau Yan Ho  
32 and Josip Car conceived the study, obtained funding, audited the data, and revised the  
33 article. All authors give final approval of the revision to be published.  
34  
35  
36  
37  
38  
39  
40  
41

### 42 **FUNDING**

43  
44 Woan Shin Tan was funded by the Singapore National Medical Research Council  
45 Research and the Singapore National Healthcare Group. This study was funded by  
46 Agency for Integrated Care Singapore, which receives public funding from the Ministry  
47 of Health of the Singaporean Government. The funder has played no role in the study  
48 design; collection, analysis or interpretation of data.  
49  
50  
51  
52  
53  
54  
55  
56  
57

## COMPETING INTERESTS

The authors declare no conflict of interest with respect to the research, authorship and/or publication of this article.

## REFERENCES

1. Greco PJ, Schulman KA, Lavizzo-Mourey R, Hansen-Flaschen J. The Patient Self-Determination Act and the future of advance directives. *Annals of internal medicine*. 1991;115(8):639-43.
2. Leng TK, Sy SL. Advance medical directives in Singapore. *Med Law Rev*. 1997;5(1):63-101.
3. Department of Statistics. Population Trends 20162016. Available from: [www.singstat.gov.sg/-/media/files/publications/population/population2016.pdf](http://www.singstat.gov.sg/-/media/files/publications/population/population2016.pdf).
4. Ministry of Health. Parliamentary Question and Answer - Advance Medical Directive (AMD) 2016 [updated Jul 11, 2016]. Available from: [www.moh.gov.sg/content/moh\\_web/home/pressRoom/Parliamentary\\_QA/2016/advanced-medical-directive--amd-.html](http://www.moh.gov.sg/content/moh_web/home/pressRoom/Parliamentary_QA/2016/advanced-medical-directive--amd-.html).
5. Rolnick JA, Asch DA, Halpern SD. Delegalizing Advance Directives - Facilitating Advance Care Planning. *The New England journal of medicine*. 2017;376(22):2105-7.
6. Sabatino CP. The evolution of health care advance planning law and policy. *The Milbank quarterly*. 2010;88(2):211-39.
7. Tay M, Chia SE, Sng J. Knowledge, attitudes and practices of the Advance Medical Directive in a residential estate in Singapore. *Ann Acad Med Singapore*. 2010;39(6):424-8.
8. Hanson LC, Rodgman E. The use of living wills at the end of life. A national study. *Archives of internal medicine*. 1996;156(9):1018-22.



- 1
  - 2
  - 3
  - 4
  - 5
  - 6
  - 7
  - 8
  - 9
  - 10
  - 11
  - 12
  - 13
  - 14
  - 15
  - 16
  - 17
  - 18
  - 19
  - 20
  - 21
  - 22
  - 23
  - 24
  - 25
  - 26
  - 27
  - 28
  - 29
  - 30
  - 31
  - 32
  - 33
  - 34
  - 35
  - 36
  - 37
  - 38
  - 39
  - 40
  - 41
  - 42
  - 43
  - 44
  - 45
  - 46
  - 47
  - 48
  - 49
  - 50
  - 51
  - 52
  - 53
  - 54
  - 55
  - 56
  - 57
  - 58
  - 59
  - 60
9. Rao JK, Anderson LA, Lin F-C, Laux JP. Completion of Advance Directives Among U.S. Consumers. *American journal of preventive medicine*. 2014;46(1):65-70.
10. Meeker MA, Jezewski MA. Family decision making at end of life. *Palliat Support Care*. 2005;3(2):131-42.
11. Houben CHM, Spruit MA, Groenen MTJ, Wouters EFM, Janssen DJA. Efficacy of Advance Care Planning: A Systematic Review and Meta-Analysis. *Journal of the American Medical Directors Association*. 2014;15(7):477-89.
12. Institute of Medicine. *Dying in America: improving quality and honoring individual preferences near the end of life*. Washington, D.C.: The National Academies Press; 2015. Available from: <http://www.nap.edu/catalog/18748/dying-in-america-improving-quality-and-honoring-individual-preferences-near>.
13. Murray L, Butow PN. Advance care planning in motor neuron disease: A systematic review. *Palliat Support Care*. 2016;14(4):411-32.
14. Walczak A, Butow PN, Bu S, Clayton JM. A systematic review of evidence for end-of-life communication interventions: Who do they target, how are they structured and do they work? *Patient education and counseling*. 2016;99(1):3-16.
15. Weathers E, O'Caomh R, Cornally N, Fitzgerald C, Kearns T, Coffey A, et al. Advance care planning: A systematic review of randomised controlled trials conducted with older adults. *Maturitas*. 2016;91:101-9.
16. Martin RS, Hayes B, Gregorevic K, Lim WK. The Effects of Advance Care Planning Interventions on Nursing Home Residents: A Systematic Review. *J Am Med Dir Assoc*. 2016;17(4):284-93.
17. Oliver DP. End-of-Life Care in U.S. Nursing Homes: A Review of the Evidence. *Journal of the American Medical Directors Association*. 2005;6(3):S20.
18. Detering KM, Hancock AD, Reade MC, Silvester W. The impact of advance care planning on end of life care in elderly patients: randomised controlled trial. *Bmj*. 2010;340:c1345.
19. Ratner E, Norlander L, McSteen K. Death at home following a targeted advance-care planning process at home: the kitchen table discussion. *Journal of the American Geriatrics Society*. 2001;49(6):778-81.

- 1
  - 2
  - 3
  - 4
  - 5
  - 6
  - 7
  - 8
  - 9
  - 10
  - 11
  - 12
  - 13
  - 14
  - 15
  - 16
  - 17
  - 18
  - 19
  - 20
  - 21
  - 22
  - 23
  - 24
  - 25
  - 26
  - 27
  - 28
  - 29
  - 30
  - 31
  - 32
  - 33
  - 34
  - 35
  - 36
  - 37
  - 38
  - 39
  - 40
  - 41
  - 42
  - 43
  - 44
  - 45
  - 46
  - 47
  - 48
  - 49
  - 50
  - 51
  - 52
  - 53
  - 54
  - 55
  - 56
  - 57
  - 58
  - 59
  - 60
20. Teno JM, Gruneir A, Schwartz Z, Nanda A, Wetle T. Association between advance directives and quality of end-of-life care: a national study. *Journal of the American Geriatrics Society*. 2007;55(2):189-94.
21. Schamp R, Tenkku L. Managed death in a PACE: pathways in present and advance directives. *J Am Med Dir Assoc*. 2006;7(6):339-44.
22. Speech by Mr Gan Kim Yong, Minister for Health, at Assisi Hospice's Charity Dinner 2011, Pan Pacific Singapore, 7 November 2011 [press release]. Singapore: Ministry of Health 2011.
23. Speech by Mr Gan Kim Yong, Minister for Health, at Singapore Palliative Care Conference at Singapore Polytechnic Convention Centre, 28 June 2014 [press release]. Singapore 2014.
24. Speech by Mr Gan Kim Yong, Minister for Health, at the opening of the Asia Pacific Hospice Conference, 27 July 2017 [press release]. Singapore, 27 July 2017 2017.
25. Inter-Ministerial Committee. Report of the Inter-Ministerial Committee on the Ageing Population. 1999.
26. Finkelstein EA, Bilger M, Flynn TN, Malhotra C. Preferences for end-of-life care among community-dwelling older adults and patients with advanced cancer: A discrete choice experiment. *Health Policy*. 2015;119(11):1482-9.
27. Malhotra C, Farooqui MA, Kanesvaran R, Bilger M, Finkelstein E. Comparison of preferences for end-of-life care among patients with advanced cancer and their caregivers: A discrete choice experiment. *Palliat Med*. 2015;29(9):842-50.
28. Low JA, Ng WC, Yap KB, Chan KM. End-of-life issues--preferences and choices of a group of elderly Chinese subjects attending a day care centre in Singapore. *Ann Acad Med Singapore*. 2000;29(1):50-6.
29. Blackbox Research. Lien Foundation Survey on Death Attitudes 2014 March 1, 2015. Available from: [http://lienfoundation.org/sites/default/files/Death%20survey%20Presser%20Final%20-%20Combined\\_0.pdf](http://lienfoundation.org/sites/default/files/Death%20survey%20Presser%20Final%20-%20Combined_0.pdf).
30. Ditto PH, Jacobson JA, Smucker WD, Danks JH, Fagerlin A. Context changes choices: a prospective study of the effects of hospitalization on life-sustaining treatment preferences. *Medical decision making : an international journal of the Society for Medical Decision Making*. 2006;26(4):313-22.

- 1
  - 2
  - 3
  - 4
  - 5
  - 6
  - 7
  - 8
  - 9
  - 10
  - 11
  - 12
  - 13
  - 14
  - 15
  - 16
  - 17
  - 18
  - 19
  - 20
  - 21
  - 22
  - 23
  - 24
  - 25
  - 26
  - 27
  - 28
  - 29
  - 30
  - 31
  - 32
  - 33
  - 34
  - 35
  - 36
  - 37
  - 38
  - 39
  - 40
  - 41
  - 42
  - 43
  - 44
  - 45
  - 46
  - 47
  - 48
  - 49
  - 50
  - 51
  - 52
  - 53
  - 54
  - 55
  - 56
  - 57
  - 58
  - 59
  - 60
31. Moorman SM, Carr D, Kirchhoff KT, Hammes BJ. An assessment of social diffusion in the Respecting Choices advance care planning program. *Death studies*. 2012;36(4):301-22.
32. Chung I, editor *Aging Issues: Advance Care Planning*. Singapore Public Health & Occupational Medicine Conference; 2013; Singapore.
33. How CH, Koh LH. Not that way: Advance Care Planning. *Singapore Medical Journal*. 2015;56(1):19-22.
34. StataCorp. *Stata Statistical Software: Release 12*. College Station, TX: StataCorp LP; 2011.
35. Ang GC, Zhang D, Lim KHJ. Differences in attitudes to end-of-life care among patients, relatives and healthcare professionals. *Singapore Medical Journal*. 2016;57(1):22-8.
36. Ng CWL, Cheong SK, Govinda Raj A, Teo WSK, Leong IYO. End-of-life care preferences of nursing home residents: Results of a cross-sectional study. *Palliative Medicine*. 2016;30(9):843-53.
37. Hoare S, Morris ZS, Kelly MP, Kuhn I, Barclay S. Do Patients Want to Die at Home? A Systematic Review of the UK Literature, Focused on Missing Preferences for Place of Death. *PLoS One*. 2015;10(11):e0142723.
38. Wood C, Salter J. *A time and a place: What people want at the end of life*. Sue Ryder. 2013.
39. Townsend J, Frank AO, Fermont D, Dyer S, Karran O, Walgrove A, et al. Terminal cancer care and patients' preference for place of death: a prospective study. *Bmj*. 1990;301(6749):415-7.
40. Agar M, Currow DC, Shelby-James TM, Plummer J, Sanderson C, Abernethy AP. Preference for place of care and place of death in palliative care: are these different questions? *Palliat Med*. 2008;22(7):787-95.
41. Jimenez G, Tan WS, Virk AK, Low CK, Car J, Yan Ho AH. Overview of Systematic Reviews of Advance Care Planning: Summary of Evidence and Global Lessons. *Journal of Pain and Symptom Management*. in press.
42. Billings JA, Bernacki R. Strategic targeting of advance care planning interventions: the Goldilocks phenomenon. *JAMA internal medicine*. 2014;174(4):620-4.

- 1  
2  
3 43. Hammes BJ, Rooney BL. Death and end-of-life planning in one midwestern  
4 community. *Archives of internal medicine*. 1998;158(4):383-90.  
5  
6
- 7 44. Auriemma CL, Nguyen CA, Bronheim R, Kent S, Nadiger S, Pardo D, et al.  
8 Stability of end-of-life preferences: a systematic review of the evidence. *JAMA*  
9 *internal medicine*. 2014;174(7):1085-92.  
10  
11
- 12 45. van der Steen JT, van Soest-Poortvliet MC, Hallie-Heierman M, Onwuteaka-  
13 Philipsen BD, Deliens L, de Boer ME, et al. Factors associated with initiation of  
14 advance care planning in dementia: a systematic review. *Journal of Alzheimer's*  
15 *disease : JAD*. 2014;40(3):743-57.  
16  
17
- 18 46. Lunney JR, Lynn J, Foley DJ, Lipson S, Guralnik JM. Patterns of functional  
19 decline at the end of life. *Jama*. 2003;289(18):2387-92.  
20  
21
- 22 47. Hamel MB, Teno JM, Goldman L, Lynn J, Davis RB, Galanos AN, et al. Patient  
23 age and decisions to withhold life-sustaining treatments from seriously ill,  
24 hospitalized adults. SUPPORT Investigators. Study to Understand Prognoses and  
25 Preferences for Outcomes and Risks of Treatment. *Annals of internal medicine*.  
26 1999;130(2):116-25.  
27  
28
- 29 48. Hamel MB, Lynn J, Teno JM, Covinsky KE, Wu AW, Galanos A, et al. Age-  
30 related differences in care preferences, treatment decisions, and clinical outcomes  
31 of seriously ill hospitalized adults: lessons from SUPPORT. *Journal of the*  
32 *American Geriatrics Society*. 2000;48(5 Suppl):S176-82.  
33  
34
- 35 49. Fukui S, Yoshiuchi K, Fujita J, Sawai M, Watanabe M. Japanese people's  
36 preference for place of end-of-life care and death: a population-based nationwide  
37 survey. *J Pain Symptom Manage*. 2011;42(6):882-92.  
38  
39
- 40 50. Chen CH, Lin YC, Liu LN, Tang ST. Determinants of preference for home death  
41 among terminally ill patients with cancer in Taiwan: a cross-sectional survey  
42 study. *J Nurs Res*. 2014;22(1):37-44.  
43  
44
- 45 51. Fukui S, Fujita J, Tsujimura M, Sumikawa Y, Hayashi Y, Fukui N. Late referrals  
46 to home palliative care service affecting death at home in advanced cancer  
47 patients in Japan: a nationwide survey. *Ann Oncol*. 2011;22(9):2113-20.  
48  
49
- 50 52. Foreman LM, Hunt RW, Luke CG, Roder DM. Factors predictive of preferred  
51 place of death in the general population of South Australia. *Palliative Medicine*.  
52 2006;20(4):447-53.  
53  
54  
55  
56  
57

- 1  
2  
3 53. Grande GE, Addington-Hall JM, Todd CJ. Place of death and access to home care  
4 services: are certain patient groups at a disadvantage? *Social science & medicine*  
5 (1982). 1998;47(5):565-79.  
6  
7  
8  
9  
10  
11  
12  
13  
14  
15  
16  
17  
18  
19  
20  
21  
22  
23  
24  
25  
26  
27  
28  
29  
30  
31  
32  
33  
34  
35  
36  
37  
38  
39  
40  
41  
42  
43  
44  
45  
46  
47  
48  
49  
50  
51  
52  
53  
54  
55  
56  
57  
58  
59  
60

For peer review only

**STROBE 2007 (v4) Statement—Checklist of items that should be included in reports of *cross-sectional studies***

| Section/Topic                | Item # | Recommendation                                                                                                                                                                       | Reported on page # |
|------------------------------|--------|--------------------------------------------------------------------------------------------------------------------------------------------------------------------------------------|--------------------|
| <b>Title and abstract</b>    | 1      | (a) Indicate the study's design with a commonly used term in the title or the abstract                                                                                               | 1                  |
|                              |        | (b) Provide in the abstract an informative and balanced summary of what was done and what was found                                                                                  | 2                  |
| <b>Introduction</b>          |        |                                                                                                                                                                                      |                    |
| Background/rationale         | 2      | Explain the scientific background and rationale for the investigation being reported                                                                                                 | 5-6                |
| Objectives                   | 3      | State specific objectives, including any prespecified hypotheses                                                                                                                     | 6                  |
| <b>Methods</b>               |        |                                                                                                                                                                                      |                    |
| Study design                 | 4      | Present key elements of study design early in the paper                                                                                                                              | 8                  |
| Setting                      | 5      | Describe the setting, locations, and relevant dates, including periods of recruitment, exposure, follow-up, and data collection                                                      | 8                  |
| Participants                 | 6      | (a) Give the eligibility criteria, and the sources and methods of selection of participants                                                                                          | 7                  |
| Variables                    | 7      | Clearly define all outcomes, exposures, predictors, potential confounders, and effect modifiers. Give diagnostic criteria, if applicable                                             | 8-10               |
| Data sources/<br>measurement | 8*     | For each variable of interest, give sources of data and details of methods of assessment (measurement). Describe comparability of assessment methods if there is more than one group | 8-9                |
| Bias                         | 9      | Describe any efforts to address potential sources of bias                                                                                                                            | 19-20              |
| Study size                   | 10     | Explain how the study size was arrived at                                                                                                                                            | 8                  |
| Quantitative variables       | 11     | Explain how quantitative variables were handled in the analyses. If applicable, describe which groupings were chosen and why                                                         | 10                 |
| Statistical methods          | 12     | (a) Describe all statistical methods, including those used to control for confounding                                                                                                | 10                 |
|                              |        | (b) Describe any methods used to examine subgroups and interactions                                                                                                                  | 10                 |
|                              |        | (c) Explain how missing data were addressed                                                                                                                                          | 12-13              |
|                              |        | (d) If applicable, describe analytical methods taking account of sampling strategy                                                                                                   | N.A.               |
|                              |        | (e) Describe any sensitivity analyses                                                                                                                                                | N.A.               |
| <b>Results</b>               |        |                                                                                                                                                                                      |                    |
| Participants                 | 13*    | (a) Report numbers of individuals at each stage of study—eg numbers potentially eligible, examined for                                                                               | 12-13              |

|                          |     |                                                                                                                                                                                                              |       |
|--------------------------|-----|--------------------------------------------------------------------------------------------------------------------------------------------------------------------------------------------------------------|-------|
|                          |     | eligibility, confirmed eligible, included in the study, completing follow-up, and analysed                                                                                                                   |       |
|                          |     | (b) Give reasons for non-participation at each stage                                                                                                                                                         | N.A.  |
|                          |     | (c) Consider use of a flow diagram                                                                                                                                                                           | N.A.  |
| Descriptive data         | 14* | (a) Give characteristics of study participants (eg demographic, clinical, social) and information on exposures and potential confounders                                                                     | 11    |
|                          |     | (b) Indicate number of participants with missing data for each variable of interest                                                                                                                          | 12-13 |
| Outcome data             | 15* | Report numbers of outcome events or summary measures                                                                                                                                                         | 12-13 |
| Main results             | 16  | (a) Give unadjusted estimates and, if applicable, confounder-adjusted estimates and their precision (eg, 95% confidence interval). Make clear which confounders were adjusted for and why they were included | 16    |
|                          |     | (b) Report category boundaries when continuous variables were categorized                                                                                                                                    | 16    |
|                          |     | (c) If relevant, consider translating estimates of relative risk into absolute risk for a meaningful time period                                                                                             | N.A.  |
| Other analyses           | 17  | Report other analyses done—eg analyses of subgroups and interactions, and sensitivity analyses                                                                                                               | 13-16 |
| <b>Discussion</b>        |     |                                                                                                                                                                                                              |       |
| Key results              | 18  | Summarise key results with reference to study objectives                                                                                                                                                     | 16-18 |
| Limitations              | 19  | Discuss limitations of the study, taking into account sources of potential bias or imprecision. Discuss both direction and magnitude of any potential bias                                                   | 19-20 |
| Interpretation           | 20  | Give a cautious overall interpretation of results considering objectives, limitations, multiplicity of analyses, results from similar studies, and other relevant evidence                                   | 16-20 |
| Generalisability         | 21  | Discuss the generalisability (external validity) of the study results                                                                                                                                        | 19-20 |
| <b>Other information</b> |     |                                                                                                                                                                                                              |       |
| Funding                  | 22  | Give the source of funding and the role of the funders for the present study and, if applicable, for the original study on which the present article is based                                                | 21    |

\*Give information separately for cases and controls in case-control studies and, if applicable, for exposed and unexposed groups in cohort and cross-sectional studies.

**Note:** An Explanation and Elaboration article discusses each checklist item and gives methodological background and published examples of transparent reporting. The STROBE checklist is best used in conjunction with this article (freely available on the Web sites of PLoS Medicine at <http://www.plosmedicine.org/>, Annals of Internal Medicine at <http://www.annals.org/>, and Epidemiology at <http://www.epidem.com/>). Information on the STROBE Initiative is available at [www.strobe-statement.org](http://www.strobe-statement.org).

# BMJ Open

## A retrospective cohort analysis of real-life decisions about end-of-life care preferences in a Southeast Asian country

|                                 |                                                                                                                                                                                                                                                                                                                                                                                                                                                                                                                                                                                    |
|---------------------------------|------------------------------------------------------------------------------------------------------------------------------------------------------------------------------------------------------------------------------------------------------------------------------------------------------------------------------------------------------------------------------------------------------------------------------------------------------------------------------------------------------------------------------------------------------------------------------------|
| Journal:                        | <i>BMJ Open</i>                                                                                                                                                                                                                                                                                                                                                                                                                                                                                                                                                                    |
| Manuscript ID                   | bmjopen-2018-024662.R1                                                                                                                                                                                                                                                                                                                                                                                                                                                                                                                                                             |
| Article Type:                   | Research                                                                                                                                                                                                                                                                                                                                                                                                                                                                                                                                                                           |
| Date Submitted by the Author:   | 06-Dec-2018                                                                                                                                                                                                                                                                                                                                                                                                                                                                                                                                                                        |
| Complete List of Authors:       | Tan, Woan Shin; National Healthcare Group, Health Services& Outcomes Research; Nanyang Technological University, Centre for Population Health Sciences<br>Bajpai, Ram; Lee Kong Chian School of Medicine<br>Ho, Andy H Y; Nanyang Technological University, Psychology<br>Low, Chan Kee; Nanyang Technological University<br>Car, Josip; Nanyang Technological University, Health Services and Outcomes Research Programme, Lee Kong Chian School of Medicine; Imperial College London, Global eHealth Unit, Department of Primary Care and Public Health, School of Public Health |
| <b>Primary Subject Heading</b>: | Palliative care                                                                                                                                                                                                                                                                                                                                                                                                                                                                                                                                                                    |
| Secondary Subject Heading:      | Health services research, Patient-centred medicine, Public health                                                                                                                                                                                                                                                                                                                                                                                                                                                                                                                  |
| Keywords:                       | advance care planning, patient preferences, place of care, place of death, cross sectional study                                                                                                                                                                                                                                                                                                                                                                                                                                                                                   |
|                                 |                                                                                                                                                                                                                                                                                                                                                                                                                                                                                                                                                                                    |

SCHOLARONE™  
Manuscripts



1  
2  
3 **A retrospective cohort analysis of real-life decisions about end-of-life care preferences in a**  
4  
5 **Southeast Asian country**  
6  
7  
8  
9

10 Woan Shin Tan<sup>1,2,3</sup>, Ram Bajpai<sup>1</sup>, Andy Hau Yan Ho<sup>1,4,5</sup>, Chan Kee Low<sup>6</sup>, Josip Car<sup>1,7</sup>  
11  
12  
13

14 <sup>1</sup>Centre for Population Health Sciences, Lee Kong Chian School of Medicine, Nanyang  
15 Technological University, Singapore  
16  
17

18 <sup>2</sup>NTU Institute for Health Technologies, Interdisciplinary Graduate School, Nanyang  
19 Technological University, Singapore  
20  
21

22 <sup>3</sup>Health Services and Outcomes Research Department, National Healthcare Group, Singapore  
23  
24

25 <sup>4</sup>Psychology Programme, School of Social Sciences, Nanyang Technological University,  
26 Singapore  
27  
28

29 <sup>5</sup>Palliative Care Centre for Excellence in Research and Education, Singapore  
30  
31

32 <sup>6</sup>Economics Programme, School of Social Sciences, Nanyang Technological University,  
33 Singapore  
34  
35

36 <sup>7</sup>Global eHealth Unit, Department of Primary Care and Public Health, School of Public Health,  
37 Imperial College London, U.K.  
38  
39  
40  
41  
42  
43  
44

45 Corresponding Author:

46  
47 Woan Shin Tan, Centre for Population Health Sciences, Nanyang Technological University,  
48 Clinical Sciences Building, 11 Mandalay Road, Singapore 308232  
49

50 Email: [woan\\_shin\\_tan@nhg.com.sg](mailto:woan_shin_tan@nhg.com.sg)  
51  
52  
53  
54  
55  
56  
57

1  
2  
3     Figures: 1  
4

5     Tables: 5  
6

7  
8     References: 48  
9

10    Word count: 3,619  
11  
12  
13  
14  
15  
16  
17  
18  
19  
20  
21  
22  
23  
24  
25  
26  
27  
28  
29  
30  
31  
32  
33  
34  
35  
36  
37  
38  
39  
40  
41  
42  
43  
44  
45  
46  
47  
48  
49  
50  
51  
52  
53  
54  
55  
56  
57  
58  
59  
60

For peer review only

## ABSTRACT

**Objective** To describe the end-of-life care preferences of individuals, and to examine the influence of age and gender on these preferences.

**Design, setting, and participants** A retrospective cohort study was conducted. Participants included all adults ( $\geq 21$  years old) ( $n=3,380$ ) who had completed a statement of their preferences as part of a national ACP programme in Singapore. Data were extracted from the national and Tan Tock Seng Hospital ACP database.

**Main Measures** End-of-life care preferences were obtained from the ACP document and differentiated by health status (healthy, chronically ill, or diagnosed with advanced illnesses). To analyse the data, descriptive statistics and logistic regression analysis were used.

**Results** Across healthy, and chronically ill patients, the majority did not opt for cardiopulmonary resuscitation (CPR) or other life-sustaining measures. Among individuals with advanced illnesses, 94% preferred not to attempt CPR but 69% still preferred to receive some form of active medical treatment. Approximately 40% chose to be cared for, and to die at home. Age and sex significantly predict preferences in those with advanced illnesses. Older age ( $\geq 75$  years) showed higher odds for home as preferred place of care (odds ratio (OR): 1.52; 95% CI: 1.23-1.89) and place of death (OR: 1.29; 95%CI: 1.03-1.61) and lower odds for CPR (OR: 0.31; 95%CI: 0.18-0.54) and full treatment (OR: 0.32; 95% CI: 0.17-0.62). Being female was associated with lower odds for home as preferred place of care (OR): 0.69; 95% CI: 0.57-0.84) and place of death (OR: 0.70; 95% CI: 0.57-0.85) and higher odds for full treatment (OR: 2.35; 95% CI: 1.18-4.68).

1  
2  
3 **Conclusion** The majority preferred to not proceed with life-sustaining treatments, but there was  
4 still a strong preference to receive some form of limited treatment. Better understanding of end-  
5 of-life care preferences through ACP can better guide end-of-life care programme planning, and  
6 resource allocation decisions.  
7  
8  
9  
10  
11  
12  
13  
14  
15  
16  
17  
18  
19  
20  
21  
22  
23  
24  
25  
26  
27  
28  
29  
30  
31  
32  
33  
34  
35  
36  
37  
38  
39  
40  
41  
42  
43  
44  
45  
46  
47  
48  
49  
50  
51  
52  
53  
54  
55  
56  
57  
58  
59  
60

For peer review only

## ARTICLE SUMMARY

### Strengths and limitations of this study

- Examined real-life end-of-life preferences of individuals across different health states
- Comprehensive coverage of a large sample of patients who received care from seven acute care hospitals, and twelve different social care providers in Singapore
- Examined the association of end-of-life care preferences with age and sex but was unable to examine the correlation with other covariates due to data limitation
- Individuals who voluntarily completed their advance care plans could be less death-avoidant
- Prospective study will allow for gathering of more variables that influence end-of-life care preferences which this study lacks

For review only

## INTRODUCTION

Most societies that are experiencing a rapidly ageing population would encounter challenges in providing high quality end-of-life care to its population. In many jurisdictions, through a process of Advance Care Planning (ACP) an individual could designate a health care decision-maker, and specify decisions regarding life-sustaining treatments in the event of decisional incapacitation. Research has found ACP to empower patients with a greater peace of mind (1), improve the level of agreement with regards to end-of-life care between patient and surrogate, reduce decisional conflict (2) and improve their satisfaction with care (3). The likelihood of dying at their preferred place was also higher among individuals who had completed an ACP (4); the transition between acute and terminal care is often smoother (5). ACP was also associated with avoiding or reducing unnecessary life-sustaining treatments (1, 4), increasing the incidence of out-of-hospital and out-of-intensive care, and increasing the probability of dying at home (6-9).

With this perspective, the Singapore government launched a comprehensive national ACP programme, “Living Matters”, in 2011. “Living Matters” is based on the Respecting Choices® programme at the Gundersen Health System in Wisconsin, US. Primarily, the programme aims to systematise the elicitation and documentation of medical and care preferences (10); with a longer-term goal of normalising death and dying conversations in the community (11, 12). Listed amongst populations that are ageing most rapidly in the world, this is a timely effort, as the need to cater for health care, including end-of-life care of the population, is expected to intensify alongside the doubling of the elderly population (13).

1  
2  
3 Surveys have been conducted locally to profile the end-of-life care preferences across different  
4 patients and community-based samples (14-17). However, surveys often require individuals to  
5 respond to a single question about their preferred place of death, based on a hypothetical end-of-  
6 life scenario (18) without having to trade-off against other priorities or account for other than one's  
7 personal concerns. Therefore, choices elicited through a survey could reflect what is preferred  
8 under more "ideal" circumstances. Since an illness impacts the individual biologically as well as  
9 socially (19), the survey process may not mirror real-life decision-making processes well (20).

10  
11  
12 Therefore, in this article, we review the demographics and end-of-life care preferences, as  
13 documented in an Advance Care Plan. Given that end-of-life care preferences could differ across  
14 different health states and over one's life cycle (21), preferences are profiled according to their  
15 health status. Additionally, we also examined the effect of age and gender on stated preferences.

## 31 **METHODOLOGY**

### 34 **Advance Care Planning programme**

35  
36 The "Living Matters" programme comprised three integrated components: (1) provision of patient  
37 educational materials; (2) trained and certified ACP facilitators who assist individuals with ACP;  
38 (3) development of an IT system to enable easily storage, and retrieval of ACP forms (22, 23). The  
39 programme has adopted a staged approach that considers a person's state of health and allows ACP  
40 to be conducted in phases across one's life-time. The conversations can then be individualised  
41 based on one's health status, which is broadly categorised as healthy, diagnosed with complex  
42 chronic illnesses or diagnosed with advanced illnesses.  
43  
44  
45  
46  
47  
48  
49  
50  
51  
52  
53  
54  
55  
56  
57  
58  
59  
60

1  
2  
3 Currently, referral to ACP and the staging of one's health status is largely based on clinical  
4 judgement. Individual clinicians also assess the individual patient's readiness to discuss end-of-  
5 life care issues. In practice, a social care or health care professional may facilitate a conversation  
6 between the patient, and his/her family members to explore his/her values, beliefs and how this  
7 impacts preferences towards medical care at the end-of-life. ACP is not legally binding in  
8 Singapore and therefore, there is no need to engage a lawyer for its discussion or documentation  
9 (24). All participating patients are encouraged to identify a substitute decision-maker (SDM), who  
10 can make health care decisions on their behalf in the event of incapacitation.  
11  
12  
13  
14  
15  
16  
17  
18  
19  
20  
21  
22  
23

24 Different questions and standardised forms apply to each of the three health states (healthy,  
25 chronically ill, with advanced illness) (Figure 1). Individuals identify a substitute decision-maker  
26 and also establish the goals of care relevant to their disease stage. They are intended to update their  
27 decisions as they transit health states. For instance, questions regarding disease-related  
28 complications are not applicable to a healthy individual whereas, for an individual with a poor  
29 prognosis, questions related to disease-related complications may no longer be applicable. Rather,  
30 they may be concerned about care during the terminal phase.  
31  
32  
33  
34  
35  
36  
37  
38  
39  
40  
41

42 End-of-life care preferences are documented in an IT system after obtaining the patient's  
43 concurrence that they accurately reflect their decisions. These recorded preferences are accessible  
44 to different providers across the acute care continuum.  
45  
46  
47  
48  
49  
50  
51  
52  
53  
54  
55  
56  
57  
58  
59  
60



### **Study design and population**

This is a retrospective cohort study that included all individuals aged 21 years and above, who have completed their ACP between January 2011 and December 2015 across all participating acute care hospitals, specialist care centres, and social care providers in Singapore.

### **Patient and public involvement**

Patients were not involved in the design of the study although end-of-life care preferences documented as part of routine clinical care were aggregated and reported in this study. As only anonymised data were analysed, data were not disseminated to the patients.

### **Ethics and consent**

Ethics approval was obtained from the institutional review board of Nanyang Technological University and Domain Specific Review Board of the National Healthcare Group, Singapore. As this is a retrospective database study, written informed consent was waived by both boards.

### **Elicited preferences by health status**

There were three different forms, general, disease specific, and the preferred plan of care (PPC) form, to cater to individuals at different health stages (healthy, chronically ill, advanced illness).

For healthy adults, they were asked about their preferences related to the goals of care when the probability of recovery or survival is low. The choices provided were: “make comfort the goal of my care and do not prolong my life in this condition” or “continue to provide all necessary life-sustaining treatment until outcomes happen to me which I find unacceptable”.

1  
2  
3 For individuals with chronic conditions, the wishes documented in an ACP form specifies  
4 preferences about CPR during cardiac arrest, and decisions about treatment options if they were to  
5 develop serious complications with (i) a low likelihood of survival, or (ii) a high likelihood of  
6 survival but might become immobile and unable to communicate, or (iii) a high likelihood of  
7 survival but might suffer from permanent cognitive impairment. The choice categories include “all  
8 treatment I need to live as long as I can”, “stop all efforts to keep me alive, allow natural death to  
9 happen” and “unsure”.

10  
11  
12 For individuals with advanced illnesses, they were asked about their CPR preferences, decisions  
13 related to medical intervention (comfort, limited additional interventions, full treatment), place of  
14 care, and place of death. Under the current programme, full treatment considers intubation,  
15 mechanical ventilation, and cardioversion. Medical management may also include transfer to  
16 intensive care if indicated. Limited additional interventions include comfort measures and may  
17 also include oral or intravenous medications. While non-invasive ventilation support is acceptable,  
18 endotracheal intubation or long-term life support measures, including admission to intensive care  
19 units are not. Comfort measures include reasonable measures made to offer food and fluids.  
20 Medications, oxygen and other measures may be used as needed for comfort, but it does not include  
21 intubation.

22  
23  
24 For place of medical treatment or care, individuals could opt for the home, hospice, nursing home,  
25 hospital, a trial of treatment in their homes before considering transfer to a hospital or a hospice,  
26 and a trial of treatment in the hospice or nursing home before transfer to a hospital. The  
27 documentation also allowed the individual to indicate “no preferences” and “others”. For place of  
28  
29  
30  
31  
32  
33  
34  
35  
36  
37  
38  
39  
40  
41  
42  
43  
44  
45  
46  
47  
48  
49  
50  
51  
52  
53  
54  
55  
56  
57  
58  
59  
60

1  
2  
3 death, individuals are asked where they would wish to be if they were left with 2-3 days of life.  
4  
5 They could opt for either the home, hospital, hospice or nursing home, and two or more alternatives  
6  
7 such as home or hospital, and home or nursing home or hospital.  
8  
9  
10

### 11 12 **Measures and data extraction** 13

14 We extracted data on ACP participant profiles and preferences from the national ACP IT system,  
15 and the Tan Tock Seng Hospital ACP database. Data fields related to the nomination of a substitute  
16 decision maker(s), preference about the administration of CPR in the event of a cardiac arrest, and  
17 end-of-life care preferences were extracted. In addition, for patients diagnosed with advanced  
18 illnesses, we extracted their preferences for place of care and death as well.  
19  
20  
21  
22  
23  
24  
25  
26  
27

28 To ascertain whether the individuals were deceased, the data was linked to death-related data from  
29 the National Registry of Birth and Deaths. Every Singaporean resident is issued with a NRIC  
30 number. For this study, a project unique identifying number (PUIN) was generated for each NRIC  
31 by a third-party vendor, who was not involved in the analysis of the data. The PUIN was then used  
32 to link data belonging to each individual person across the datasets.  
33  
34  
35  
36  
37  
38  
39  
40  
41

### 42 **Data analysis** 43

44 Descriptive statistics were used to characterise the sample and to summarise the basic  
45 characteristics of the data. Frequency distribution tables were created to profile the characteristics  
46 of the study samples and to describe the documented end-of-life care preferences. A chi-square  
47 test was used to determine whether a statistically significant relationship exists between two or  
48 more categorical variables.  
49  
50  
51  
52  
53  
54  
55  
56  
57

1  
2  
3 We examined the independent effects of age and gender on four different end-of-life care statement  
4 of preference. We dichotomised the preferences for: (i) cardiopulmonary resuscitation (CPR)  
5 (“attempt” or “do not attempt”), (ii) medical intervention (“treatment” or “comfort measures”),  
6 (iii) preferred place of medical treatment (“home” or “others”) and (iv) preferred place of death  
7 (“home” or “others”). Multivariable logistic regression was performed to investigate the  
8 relationship between age and sex with these preferences. All statistical tests were conducted using  
9 Stata version 12 (25), and a two-sided p-value of 0.05 was set as the level of statistical significance.  
10  
11  
12  
13  
14  
15  
16  
17  
18  
19

## 20 **RESULTS**

21  
22  
23 A total of 3,380 completed ACP documents were captured in the databases, with approximately  
24 90% completed in acute hospitals. The patient characteristics can be seen in Table 1. 60% of the  
25 patients were aged 75 years and above, and there was demographic variation across the three types  
26 of ACP, with younger age profiles for those who completed the general and disease-specific forms.  
27  
28 Among all individuals who completed the ACP, 53.2% (1798/3380) were deceased as at 31  
29 December 2015, with the highest share for PPC. The overall median time between ACP  
30 completion and death was 7.27 months (95% CI: 6.35-8.18); 63.2% completed ACP within three  
31 months prior to death, 52.9% within six months and 42.3% within 12 months.  
32  
33  
34  
35  
36  
37  
38  
39  
40  
41  
42  
43  
44  
45  
46  
47  
48  
49  
50  
51  
52  
53  
54  
55  
56  
57  
58  
59  
60

**Table 1** Profile of individuals by type of ACP.

| Variable     | Category    | Type of ACP        |                           |                            | Total<br>(n, %)      | p-value |
|--------------|-------------|--------------------|---------------------------|----------------------------|----------------------|---------|
|              |             | Healthy<br>(n, %)  | Chronic illness<br>(n, %) | Advanced<br>illness (n, %) |                      |         |
| Age          | < 55 years  | 77 (11.9)          | 6 (12.2)                  | 142 (5.3)                  | 225 (6.7)            | <0.001  |
|              | 55–64 years | 193 (29.9)         | 14 (28.6)                 | 259 (9.6)                  | 466 (13.8)           |         |
|              | 65–74 years | 203 (31.4)         | 17 (34.7)                 | 445 (16.6)                 | 665 (19.7)           |         |
|              | ≥ 75 years  | 173 (26.8)         | 12 (25.5)                 | 1,839 (68.5)               | 2,024 (59.9)         |         |
| Sex          | Female      | 359 (55.6)         | 19 (38.8)                 | 1,316 (49.0)               | 1,694 (50.1)         | 0.001   |
|              | Male        | 265 (41.0)         | 28 (57.1)                 | 1,335 (49.7)               | 1,628 (48.2)         |         |
|              | Missing     | 22 (3.4)           | 2 (4.1)                   | 34 (1.3)                   | 58 (1.7)             |         |
| Deceased     | Yes         | 57 (8.8)           | 10 (20.4)                 | 1,731 (64.5)               | 1,798 (53.2)         | <0.001  |
|              | No          | 589 (91.2)         | 39 (79.6)                 | 954 (35.5)                 | 1582 (46.8)          |         |
| <b>Total</b> |             | <b>646 (100.0)</b> | <b>49 (100.0)</b>         | <b>2,685 (100.0)</b>       | <b>3,380 (100.0)</b> |         |

### Documented preferences

Data related to preferences for end-of-life care are represented in Table 2. For healthy individuals who had completed the general ACP, 1 in 8 persons indicated a preference for life-sustaining treatment. For individuals who had completed the disease-specific form, close to 1 in 3 opted for CPR and life-sustaining treatment, even if the likelihood of surviving the complications of the illness were low or if they were to lose their ability to move around or communicate. However, only 16.3% opted for full treatment if they were to become mentally incapacitated because of their illness.

For individuals with advanced illnesses (Table 3), 5.7% opted for CPR and 5.1% opted for full medical intervention. The majority preferred the initiation of a limited trial of treatment, which would be continued with comfort measures if there was no clinical improvement. Approximately 43.6% of individuals preferred to receive treatment in their homes, but 77.4% of these individuals would consider being transferred to an acute hospital after a trial of care at home. Only 29.7% stated the hospital as their preferred site of care. For place of death, 40.4% preferred dying at home,

and only 14.1% preferred the hospital. One highlight is that although only 4.1% did not state any preference or were unsure about the place of care, 23% of respondents did indicate their preferences with regards to the preferred place of death.

**Table 2** End-of-life care preferences in general and disease specific ACP forms.

| <b>Documented preferences</b>                                           | <b>N, %</b>  |
|-------------------------------------------------------------------------|--------------|
| <b>Healthy individuals (n = 646)</b>                                    |              |
| Appointment substitute decision maker                                   | 581 (89.9)   |
| Comfort measures                                                        | 560 (86.7)   |
| Life-sustaining treatments                                              | 79 (12.2)    |
| <b>Individuals with chronic illness (n = 49)</b>                        |              |
| Appointment 1 <sup>st</sup> substitute decision maker                   | 35 (71.4)    |
| Appointment 2 <sup>nd</sup> substitute decision maker                   | 15 (30.6)    |
| Serious complication with low chance of survival                        |              |
| Full treatment                                                          | 16 (32.7)    |
| Stop treatment                                                          | 31 (63.3)    |
| Serious complication with loss of ability to move around or communicate |              |
| Full treatment                                                          | 15 (30.6)    |
| Stop treatment                                                          | 32 (65.3)    |
| Serious complication with mental incapacity                             |              |
| Full treatment                                                          | 8 (16.3)     |
| Stop treatment                                                          | 38 (77.6)    |
| Cardiopulmonary resuscitation                                           |              |
| Attempt                                                                 | 14 (28.6)    |
| Do not attempt                                                          | 19 (38.8)    |
| Do not attempt if doctor believes low survival chances                  | 14 (28.6)    |
| <b>Individuals with advanced illness (n = 2685)</b>                     |              |
| Appointment 1 <sup>st</sup> substitute decision maker                   | 2,526 (94.1) |
| Appointment 2 <sup>nd</sup> substitute decision maker                   | 1,357 (50.5) |
| Cardiopulmonary resuscitation                                           |              |
| Attempt                                                                 | 152 (5.7)    |
| Do not attempt                                                          | 2,511 (93.5) |
| Do not attempt if doctor believes low survival chances                  | 22 (0.8)     |
| Medical intervention                                                    |              |
| Full treatment                                                          | 138 (5.1)    |
| Limited additional interventions                                        | 1,851 (68.9) |
| Comfort measures only                                                   | 677 (25.2)   |
| Unsure                                                                  | 19 (0.7)     |
| Preferred place of medical treatment                                    |              |
| Home                                                                    | 265 (9.8)    |
| Hospital                                                                | 798 (29.7)   |
| Nursing home                                                            | 166 (6.2)    |

| <b>Documented preferences</b>                                | <b>N, %</b>  |
|--------------------------------------------------------------|--------------|
| Hospice                                                      | 131 (4.9)    |
| Trial of treatment before consider transfer to hospital      |              |
| Home                                                         | 908 (33.8)   |
| Nursing home                                                 | 269 (10.0)   |
| Hospice                                                      | 28 (1.0)     |
| Others (no preference, unsure)                               | 110 (4.1)    |
| Missing                                                      | 10 (0.4)     |
| Preferred place of death                                     |              |
| Patient's home                                               | 1,084 (40.4) |
| Hospital                                                     | 379 (14.1)   |
| Nursing home                                                 | 160 (5.9)    |
| Hospice                                                      | 156 (5.8)    |
| Home or hospital/nursing home/hospice                        | 112 (4.2)    |
| Healthcare institution (hospital or nursing home or hospice) | 177 (6.7)    |
| Others (no preference, unsure)                               | 617 (23.0)   |

ACP: Advance Care Planning; CPR: Cardiopulmonary Resuscitation

### Relationship between patient and SDM

The share of individuals who had appointed a substitute decision-maker varied across the three types of ACP. The rates of nomination were, however, lower for those who completed the general and disease-specific plans. For the PPC, only 8% of individuals did not identify a substitute decision-maker (Table 3). From Table 4.4, 78% of individuals nominated their immediate family (spouse, children, grandchildren) to speak on their behalf if they were incapacitated. Only a small percentage nominated non-related persons. Most ACP discussions also took place in the acute care setting.

**Table 3** Relationship with substitute decision maker.

| <b>Type of substitute</b>                   | <b>Type of ACP</b> |                              |                            | <b>Total</b>        | <b>p-value</b> |
|---------------------------------------------|--------------------|------------------------------|----------------------------|---------------------|----------------|
|                                             | Healthy<br>(n, %)  | Chronic<br>illness<br>(n, %) | Advanced<br>illness (n, %) |                     |                |
| Spouse                                      | 185 (28.6)         | 8 (16.3)                     | 320 (11.9)                 | 513 (15.2)          | <0.001         |
| Child, child-in-law, or grandchild          | 230 (35.6)         | 20 (40.8)                    | 1869 (69.6)                | 2119 (62.7)         |                |
| Other relatives and friends                 | 136 (21.1)         | 2 (4.1)                      | 266 (9.9)                  | 404 (12.0)          |                |
| Others (including healthcare professionals) | 14 (2.2)           | 1 (2.0)                      | 10 (0.4)                   | 25 (0.7)            |                |
| Missing                                     | 81 (12.5)          | 18 (36.7)                    | 220 (8.2)                  | 319 (9.4)           |                |
| <b>Total</b>                                | <b>646 (100.0)</b> | <b>49 (100.0)</b>            | <b>2685 (100.0)</b>        | <b>3380 (100.0)</b> |                |

### Relationship between preferred place of care and place of death

Table 4 assessed the relationship between place of care and place of death. The results indicated that there was a high level of agreement and strong correlation in preferences related to being cared for at home and dying at home. Other than this, the place of care is not synonymous with where they would like to die at. Close to 1 in 3 individuals who preferred the hospital as the location of care, had also opted for home as the place of death.

**Table 4** Preferred place of care and preferred place of death.

| Place of Death                        | Place of Care |          |                    |                    |                          |                        |                     | Total |
|---------------------------------------|---------------|----------|--------------------|--------------------|--------------------------|------------------------|---------------------|-------|
|                                       | Home          | Hospital | Hospice            | Nursing home       | Home to Hospital/Hospice | Hospice to NH/Hospital | Others <sup>#</sup> |       |
| Home                                  | 90.9**        | 31.1     | 9.9                | 5.4                | 57.3                     | 12.1                   | 12.7                | 40.4  |
| Hospital                              | 0.8           | 30.3**   | 0.0                | 1.2                | 9.7                      | 13.7                   | 2.7                 | 14.1  |
| Hospice                               | 0.8           | 3.1      | 67.9 <sup>NS</sup> | 0.6                | 2.6                      | 3.3                    | 4.5                 | 5.8   |
| Nursing home                          | 0.4           | 0.4      | 0.0                | 70.5 <sup>NS</sup> | 0.2                      | 12.1*                  | 0.0                 | 6.0   |
| Home or hospital/nursing home/hospice | 1.9           | 3.5      | 1.5                | 0.0                | 8.0**                    | 2.0                    | 2.7                 | 4.4   |
| Healthcare institution                | 0.4           | 4.4      | 4.6                | 6.6*               | 1.2                      | 30.3*                  | 19.1                | 6.6   |
| Others <sup>#</sup>                   | 4.9           | 26.7     | 16.0               | 15.7               | 20.9                     | 26.7                   | 58.2**              | 22.7  |

Note: #: no preferences, unsure; \*p<0.05; \*\*p<0.01

### Relationship between treatment preferences and patient profile

As age and sex were not correlated with preferences for healthy and chronically ill individuals, the results were excluded. Table 5 illustrates the results from a logistic regression to assess the impact of age and sex on the preferences of those with advanced illnesses. Those aged 75 years and above were more likely to not opt for CPR and comfort measures, compared to younger individuals. Care at home or having a trial of care at home was the preferred option for the older age group. Similarly, older people exhibited a stronger likelihood of preferring to die at home. There were no significant gender differences in preferences for CPR. However, there was a higher likelihood of females



1  
2  
3 opting for full treatment than comfort measures. This is also consistent with the relatively lower  
4  
5 odds of choosing home as the site of care and place of death, compared to males.  
6  
7

8 **Table 5** Multivariable logistic regression of preferences by age and sex with 2,685 subjects who  
9 had completed the PPC form.

| Preferred plan of care                      | Age $\geq 75$ vs. Age $< 75$ | Female vs. Male         |
|---------------------------------------------|------------------------------|-------------------------|
|                                             | Adjusted OR<br>(95% CI)      | Adjusted OR<br>(95% CI) |
| <b>CPR</b>                                  |                              |                         |
| Attempt vs. Do not attempt                  | 0.31 (0.18-0.54)             | 1.56 (0.87-2.79)        |
| <b>Medical intervention</b>                 |                              |                         |
| Treatment vs. Comfort measures              | 0.32 (0.17-0.62)             | 2.35 (1.18-4.68)        |
| <b>Preferred place of medical treatment</b> |                              |                         |
| Home & trial at home vs. Others             | 1.52 (1.23-1.89)             | 0.69 (0.57-0.84)        |
| <b>Preferred place of death</b>             |                              |                         |
| Home vs. Others                             | 1.29 (1.03-1.61)             | 0.70 (0.57-0.85)        |

24 Model includes variables: age and sex

25 CPR: Cardiopulmonary Resuscitation; OR: Odds Ratio; C.I.: Confidence Interval

## 28 DISCUSSION

31 This is the first study to have quantified actual decisions about end-of-life care, in a relatively large  
32 clinical sample in Singapore. Other published studies have adopted a survey design to elicit  
33 preferences as part of research (14, 15, 26). The findings offered insights into decisions made under  
34 real-life situations, where the stated preferences were supposed to reflect goals of care of the  
35 individual. Singapore stands apart being an Asian country that is strongly influenced by Western  
36 culture where the people have a strong desire for independence together with a collectivist  
37 mentality (27). The results of this study could therefore be of relevance to other Asian countries  
38 that are also experiencing rapid socioeconomic and demographic transitions.  
39  
40  
41  
42  
43  
44  
45  
46  
47  
48  
49

51 In our study, most individuals nominated their family members to speak on their behalf if they  
52 were incapacitated, which is similar to what was observed in other studies (28). Among healthy  
53  
54  
55  
56  
57

1  
2  
3 and chronically ill patients, the majority did not opt for CPR or other life-sustaining measures.  
4  
5 Among those with advanced illness, more than 90% preferred not to attempt CPR, but more than  
6  
7 70% still preferred to receive some form of active medical treatment at the end-of-life, rather than  
8  
9 comfort care. In this national sample, approximately 4 in 10 chose to be cared for and to die at  
10  
11 home. Other Singaporean studies examined the preferences of nursing home residents (29) and  
12  
13 those who received care in a day care centre (16). These studies similarly found that while most  
14  
15 individuals did not opt for CPR, they did express a preference to receive some form of active  
16  
17 treatment (16, 29).  
18  
19  
20  
21  
22  
23

24 In 2014, the Lien Foundation, a Singapore philanthropic house, commissioned a community-based  
25  
26 survey to determine the death attitudes and the level of awareness about hospice and palliative  
27  
28 care. The survey reported that 70% and 77% of the surveyed individuals would prefer to be cared  
29  
30 for, and to die at home respectively (17). Preferences for medical treatment at home, and for home  
31  
32 deaths were significantly lower in our sample. Public opinions often do not coincide with the views  
33  
34 of individuals who are close to the end-of-life (20). Other research, such as those examining health  
35  
36 state valuation, have pointed out the differences between these two groups (30); reflecting different  
37  
38 priorities and changing experiences. The complexity of choices also grows as death draws near  
39  
40 (31). When healthy participants are asked to make decisions regarding hypothetical scenarios  
41  
42 about death and dying, the 'shock' or fear that he or she experiences (32) about potentially dying  
43  
44 in an unfamiliar environment, could sway decisions towards the familiar – meaning the home.  
45  
46 Juxtaposed against other priorities, such as pain and symptom management, and alleviating  
47  
48 caregiver burden, the “cost” of maintaining one’s decision to die at home may also increase (33).  
49  
50  
51  
52  
53  
54 At the same time, the fear of the unfamiliar could decrease over time, as patients increasingly adapt  
55  
56  
57  
58  
59  
60

1  
2  
3 to new living and care arrangements in other settings, such as nursing homes or hospices (34). One  
4  
5 in five individuals have been found to change their preferences over time (18).  
6  
7  
8  
9

10 We also found that, although the preferred place of care and place of death are related, they are  
11  
12 not equivalent. While only a small percentage of individuals did not have strict preferences about  
13  
14 where they are being cared for, almost 1 in 4 individuals expressed that they had no preferred place  
15  
16 of death. Other studies have similarly indicated that these two dimensions are not equivalent,  
17  
18 although healthcare professionals may use them interchangeably in practice (35).  
19  
20  
21  
22  
23

24 In our study, the time between ACP completion and death was 7.3 months. While there is no  
25  
26 objective optimal timing (36), this is relatively shorter than the median times (14 - 37 months)  
27  
28 reported in literature (37, 38). Given that the discussion about preferences should occur before  
29  
30 physical or mental incapacitation, earlier initiation can be beneficial to the patients. At the same  
31  
32 time, it is important to strike a balance because conducting the ACP conversation too early when  
33  
34 preferences are still unstable (39) could lead to unrealistic choices based on hypothesised scenarios  
35  
36 (37). ACP initiation should take into account patient and family receptivity, and ideally, precede  
37  
38 major health deterioration that could lead to decisional incapacitation (40). Different diseases have  
39  
40 different pathways of functional declines (41), which also needs to be considered.  
41  
42  
43  
44  
45  
46

47 In our sample of patients with advanced illnesses, we found that age was positively associated with  
48  
49 preferences to withhold life-sustaining treatments, which was similar to the findings of several  
50  
51 studies (42, 43). We found that individuals older than 75 years were more likely to opt for the  
52  
53 home as the place of care and death; but other studies reported that younger individuals more  
54  
55  
56  
57  
58  
59  
60

1  
2  
3 strongly prefer home as the place of care (44), or that age did not have a significant effect (45).  
4  
5 Cultural differences, in the meaning assigned to the “home” as a place of care and death, or even  
6  
7 the availability of alternative palliative care facilities in different countries, could have resulted in  
8  
9 the mixed evidence. For instance, due to the availability of inpatient palliative care units in Japan,  
10  
11 older individuals had stronger preferences for the patient palliative care unit as the site of care than  
12  
13 home (44). Our finding, that females were less likely to prefer to be cared for and die at home, was  
14  
15 similarly reported in other studies (46, 47). This could reflect the general longer life expectancy of  
16  
17 females compared to males. This reduced likelihood of spousal support at the end-of-life could  
18  
19 make home less preferred as an option (48).  
20  
21  
22  
23  
24  
25

### 26 **Policy & practice implications**

27  
28 Currently, efforts to implement ACP are focused on the elderly and those with advanced illnesses.  
29  
30 Based on the numbers of completed disease-specific forms, the take-up by chronically ill  
31  
32 individuals is very low. While better integration of ACP with chronic disease management efforts  
33  
34 or more rapid expansion of ACP to the outpatient and community settings could assist in improving  
35  
36 coverage, additional resources would concurrently be needed to assist hospitals to expand coverage  
37  
38 to younger adults, and bringing ACP conversations forward in the life-cycle of an individual.  
39  
40 Building community awareness of, and acceptance towards ACP will be crucial.  
41  
42  
43  
44  
45  
46

47 Policies should also consider a range of perspectives and preferences, especially of sub-  
48  
49 populations that they will most immediately affect. Preferences elicited from surveys can be  
50  
51 viewed as an aspirational target that is achievable if practical barriers were eradicated.  
52  
53 Additionally, due to the relatively high proportion of individuals who still preferred hospital as the  
54  
55  
56  
57

1  
2  
3 location of care, policy-makers still need to focus on improving the end-of-life care experience in  
4 formal healthcare institutions, while also expanding home palliative care capacity to cater to those  
5 who preferred home as the first place of care, and place of death.  
6  
7  
8  
9  
10

## 11 **Limitations**

12  
13  
14 The sample comprised largely the patients receiving care in the acute care hospitals, and the results  
15 may not be generalisable for patients in the community care settings or to other individuals who  
16 have elected not to participate in ACP. Individuals who had completed the ACP documentation  
17 could be less death-avoidant, and therefore, have different preferences compared to others. Other  
18 studies have also highlighted the importance of the family and care context on care preferences. A  
19 recent systematic review highlighted the lack of research evidence on ethnicity and religion, which  
20 is also absent from this study. Future research should explore the influence of these pertinent  
21 elements including a closer examination of the influence of different illnesses (advanced  
22 malignancy, end-stage organ failure or neuro-degenerative diseases) on end-of-life care  
23 preferences.  
24  
25  
26  
27  
28  
29  
30  
31  
32  
33  
34  
35  
36  
37

## 38 **CONCLUSION**

39  
40  
41 This study identified that most of the individuals in our sample, regardless of health status,  
42 preferred not to proceed with life-sustaining treatments across a spectrum of health scenarios.  
43 However, individuals with advanced illnesses still preferred to receive some form of active  
44 support, e.g. non-invasive ventilation support; or oral and intravenous drug administration. Our  
45 results imply that policies should consider not just home-based end-of-life care, but also actively  
46 focus on the quality of end-of-life care in hospitals, since many individuals still opt for them as the  
47 site of care.  
48  
49  
50  
51  
52  
53  
54  
55  
56  
57

## ACKNOWLEDGEMENTS

We would like to thank Dr. Raymond Ng, Consultant, Department of Palliative Medicine, Tan Tock Seng Hospital for contributing data that were used in the analysis. We would also like to acknowledge Mr. Geronimo Jimenez, NTU; Dr. Sng Ming Keat, NTU; and other colleagues from the Agency for Integrated Care and the Ministry of Health for providing project support.

For peer review only

## References

1. Murray L, Butow PN. Advance care planning in motor neuron disease: A systematic review. *Palliative & supportive care*. 2016;14(4):411-32.
2. Walczak A, Butow PN, Bu S, Clayton JM. A systematic review of evidence for end-of-life communication interventions: Who do they target, how are they structured and do they work? *Patient education and counseling*. 2016;99(1):3-16.
3. Weathers E, O'Caoimh R, Cornally N, Fitzgerald C, Kearns T, Coffey A, et al. Advance care planning: A systematic review of randomised controlled trials conducted with older adults. *Maturitas*. 2016;91:101-9.
4. Martin RS, Hayes B, Gregorevic K, Lim WK. The Effects of Advance Care Planning Interventions on Nursing Home Residents: A Systematic Review. *Journal of the American Medical Directors Association*. 2016;17(4):284-93.
5. Oliver DP. End-of-Life Care in U.S. Nursing Homes: A Review of the Evidence. *Journal of the American Medical Directors Association*. 2005;6(3):S20.
6. Detering KM, Hancock AD, Reade MC, Silvester W. The impact of advance care planning on end of life care in elderly patients: randomised controlled trial. *BMJ (Clinical research ed)*. 2010;340:c1345.
7. Ratner E, Norlander L, McSteen K. Death at home following a targeted advance-care planning process at home: the kitchen table discussion. *Journal of the American Geriatrics Society*. 2001;49(6):778-81.
8. Teno JM, Gruneir A, Schwartz Z, Nanda A, Wetle T. Association between advance directives and quality of end-of-life care: a national study. *Journal of the American Geriatrics Society*. 2007;55(2):189-94.
9. Schamp R, Tenkku L. Managed death in a PACE: pathways in present and advance directives. *Journal of the American Medical Directors Association*. 2006;7(6):339-44.
10. Speech by Mr Gan Kim Yong, Minister for Health, at Assisi Hospice's Charity Dinner 2011, Pan Pacific Singapore, 7 November 2011 [press release]. Singapore: Ministry of Health2011.
11. Speech by Mr Gan Kim Yong, Minister for Health, at Singapore Palliative Care Conference at Singapore Polytechnic Convention Centre, 28 June 2014 [press release]. Singapore2014.
12. Speech by Mr Gan Kim Yong, Minister for Health, at the opening of the Asia Pacific Hospice Conference, 27 July 2017 [press release]. Singapore, 27 July 2017 2017.
13. Inter-Ministerial Committee. Report of the Inter-Ministerial Committee on the Ageing Population. 1999.

14. Finkelstein EA, Bilger M, Flynn TN, Malhotra C. Preferences for end-of-life care among community-dwelling older adults and patients with advanced cancer: A discrete choice experiment. *Health Policy*. 2015;119(11):1482-9.
15. Malhotra C, Farooqui MA, Kanavaran R, Bilger M, Finkelstein E. Comparison of preferences for end-of-life care among patients with advanced cancer and their caregivers: A discrete choice experiment. *Palliative medicine*. 2015;29(9):842-50.
16. Low JA, Ng WC, Yap KB, Chan KM. End-of-life issues--preferences and choices of a group of elderly Chinese subjects attending a day care centre in Singapore. *Annals of the Academy of Medicine, Singapore*. 2000;29(1):50-6.
17. Blackbox Research. Lien Foundation Survey on Death Attitudes 2014 March 1, 2015. Available from: [http://lienfoundation.org/sites/default/files/Death%20survey%20Presser%20Final%20-%20Combined\\_0.pdf](http://lienfoundation.org/sites/default/files/Death%20survey%20Presser%20Final%20-%20Combined_0.pdf).
18. Gomes B, Calanzani N, Gysels M, Hall S, Higginson IJ. Heterogeneity and changes in preferences for dying at home: a systematic review. *BMC Palliative Care*. 2013;12(1):7.
19. Siminoff LA. Incorporating patient and family preferences into evidence-based medicine. *BMC Medical Informatics and Decision Making*. 2013;13(3):S6.
20. Hoare S, Morris ZS, Kelly MP, Kuhn I, Barclay S. Do Patients Want to Die at Home? A Systematic Review of the UK Literature, Focused on Missing Preferences for Place of Death. *PLoS One*. 2015;10(11):e0142723.
21. Ditto PH, Jacobson JA, Smucker WD, Danks JH, Fagerlin A. Context changes choices: a prospective study of the effects of hospitalization on life-sustaining treatment preferences. *Medical decision making : an international journal of the Society for Medical Decision Making*. 2006;26(4):313-22.
22. Moorman SM, Carr D, Kirchhoff KT, Hammes BJ. An assessment of social diffusion in the Respecting Choices advance care planning program. *Death studies*. 2012;36(4):301-22.
23. Chung I, editor *Aging Issues: Advance Care Planning*. Singapore Public Health & Occupational Medicine Conference; 2013; Singapore.
24. How CH, Koh LH. Not that way: Advance Care Planning. *Singapore Medical Journal*. 2015;56(1):19-22.
25. StataCorp. *Stata Statistical Software: Release 12*. College Station, TX: StataCorp LP; 2011.
26. Lee A, Pang WS. Preferred place of death--a local study of cancer patients and their relatives. *Singapore Med J*. 1998;39(10):447-50.



- 1  
2  
3 27. Li J, Ngin PM, Teo AC. Culture and leadership in Singapore: Combination of the East  
4 and the West. 2008.  
5  
6 28. Ang GC, Zhang D, Lim KHJ. Differences in attitudes to end-of-life care among patients,  
7 relatives and healthcare professionals. *Singapore Medical Journal*. 2016;57(1):22-8.  
8  
9 29. Ng CWL, Cheong SK, Govinda Raj A, Teo WSK, Leong IYO. End-of-life care  
10 preferences of nursing home residents: Results of a cross-sectional study. *Palliative medicine*.  
11 2016;30(9):843-53.  
12  
13 30. Stamuli E. Health outcomes in economic evaluation: who should value health? *British*  
14 *medical bulletin*. 2011;97:197-210.  
15  
16 31. Wood C, Salter J. A time and a place: What people want at the end of life. Sue Ryder.  
17 2013.  
18  
19 32. Kahneman D, editor *Determinants of health economic decisions in actual practice: the*  
20 *role of behavioral economics*. ISPOR 10th Annual International Meeting, May 16, 2005,  
21 Washington, DC, USA  
22  
23 2005 Mar-Apr: Value in Health.  
24  
25 33. Townsend J, Frank AO, Fermont D, Dyer S, Karran O, Walgrove A, et al. Terminal  
26 cancer care and patients' preference for place of death: a prospective study. *BMJ (Clinical*  
27 *research ed)*. 1990;301(6749):415-7.  
28  
29 34. Barclay S, Arthur A. Place of death — how much does it matter?: The priority is to  
30 improve end-of-life care in all settings. *The British Journal of General Practice*.  
31 2008;58(549):229-31.  
32  
33 35. Agar M, Currow DC, Shelby-James TM, Plummer J, Sanderson C, Abernethy AP.  
34 Preference for place of care and place of death in palliative care: are these different questions?  
35 *Palliative medicine*. 2008;22(7):787-95.  
36  
37 36. Jimenez G, Tan WS, Virk AK, Low CK, Car J, Yan Ho AH. Overview of Systematic  
38 Reviews of Advance Care Planning: Summary of Evidence and Global Lessons. *Journal of Pain*  
39 *and Symptom Management*. in press.  
40  
41 37. Billings JA, Bernacki R. Strategic targeting of advance care planning interventions: the  
42 Goldilocks phenomenon. *JAMA internal medicine*. 2014;174(4):620-4.  
43  
44 38. Hammes BJ, Rooney BL. Death and end-of-life planning in one midwestern community.  
45 *Archives of Internal Medicine*. 1998;158(4):383-90.  
46  
47 39. Auriemma CL, Nguyen CA, Bronheim R, Kent S, Nadiger S, Pardo D, et al. Stability of  
48 end-of-life preferences: a systematic review of the evidence. *JAMA internal medicine*.  
49 2014;174(7):1085-92.  
50  
51  
52  
53  
54  
55  
56  
57  
58  
59  
60

- 1  
2  
3  
4  
5  
6  
7  
8  
9  
10  
11  
12  
13  
14  
15  
16  
17  
18  
19  
20  
21  
22  
23  
24  
25  
26  
27  
28  
29  
30  
31  
32  
33  
34  
35  
36  
37  
38  
39  
40  
41  
42  
43  
44  
45  
46  
47  
48  
49  
50  
51  
52  
53  
54  
55  
56  
57  
58  
59  
60
40. van der Steen JT, van Soest-Poortvliet MC, Hallie-Heierman M, Onwuteaka-Philipsen BD, Deliëns L, de Boer ME, et al. Factors associated with initiation of advance care planning in dementia: a systematic review. *Journal of Alzheimer's disease : JAD*. 2014;40(3):743-57.
41. Lunney JR, Lynn J, Foley DJ, Lipson S, Guralnik JM. Patterns of functional decline at the end of life. *Jama*. 2003;289(18):2387-92.
42. Hamel MB, Teno JM, Goldman L, Lynn J, Davis RB, Galanos AN, et al. Patient age and decisions to withhold life-sustaining treatments from seriously ill, hospitalized adults. SUPPORT Investigators. Study to Understand Prognoses and Preferences for Outcomes and Risks of Treatment. *Annals of internal medicine*. 1999;130(2):116-25.
43. Hamel MB, Lynn J, Teno JM, Covinsky KE, Wu AW, Galanos A, et al. Age-related differences in care preferences, treatment decisions, and clinical outcomes of seriously ill hospitalized adults: lessons from SUPPORT. *Journal of the American Geriatrics Society*. 2000;48(5 Suppl):S176-82.
44. Fukui S, Yoshiuchi K, Fujita J, Sawai M, Watanabe M. Japanese people's preference for place of end-of-life care and death: a population-based nationwide survey. *Journal of pain and symptom management*. 2011;42(6):882-92.
45. Chen CH, Lin YC, Liu LN, Tang ST. Determinants of preference for home death among terminally ill patients with cancer in Taiwan: a cross-sectional survey study. *The journal of nursing research : JNR*. 2014;22(1):37-44.
46. Fukui S, Fujita J, Tsujimura M, Sumikawa Y, Hayashi Y, Fukui N. Late referrals to home palliative care service affecting death at home in advanced cancer patients in Japan: a nationwide survey. *Annals of oncology : official journal of the European Society for Medical Oncology*. 2011;22(9):2113-20.
47. Foreman LM, Hunt RW, Luke CG, Roder DM. Factors predictive of preferred place of death in the general population of South Australia. *Palliative medicine*. 2006;20(4):447-53.
48. Grande GE, Addington-Hall JM, Todd CJ. Place of death and access to home care services: are certain patient groups at a disadvantage? *Social science & medicine* (1982). 1998;47(5):565-79.

**Footnotes**

**Contributors** Woan Shin Tan, and Ram Bajpai conceived and designed the study, obtained, analysed, interpreted the data, drafted and revised the article. Chan Kee Low, Andy Hau Yan Ho and Josip Car conceived the study, participated in the interpretation of results, and revised the article. All authors were involved in revising the manuscript critically for important intellectual content and have given final approval of the final version of the manuscript.

**Funding** Woan Shin Tan was funded by the Singapore National Medical Research Council Research (grant number: NMRC/Fellowship/0017/2015) and the Singapore National Healthcare Group. This study was funded by Agency for Integrated Care Singapore (grant number: RCA 16-099), which receives public funding from the Ministry of Health of the Singaporean Government. The funder has played no role in the study design, analysis or interpretation of data.

**Competing interests** None declared.

**Patient consent** None declared.

**Ethics approval** Ethics approval was obtained from the institutional review boards of Nanyang Technological University [Ref: IRB-2016-03-010] and the National Healthcare Group's Domain Specific Review Board [Ref: 2016/00739].

**Provenance and peer review** Not commissioned; externally peer reviewed.

**Data sharing statement** No additional data available.

1  
2  
3 **Figure 1** End-of-life care decisions by health status.  
4  
5  
6  
7  
8  
9  
10  
11  
12  
13  
14  
15  
16  
17  
18  
19  
20  
21  
22  
23  
24  
25  
26  
27  
28  
29  
30  
31  
32  
33  
34  
35  
36  
37  
38  
39  
40  
41  
42  
43  
44  
45  
46  
47  
48  
49  
50  
51  
52  
53  
54  
55  
56  
57  
58  
59  
60

For peer review only

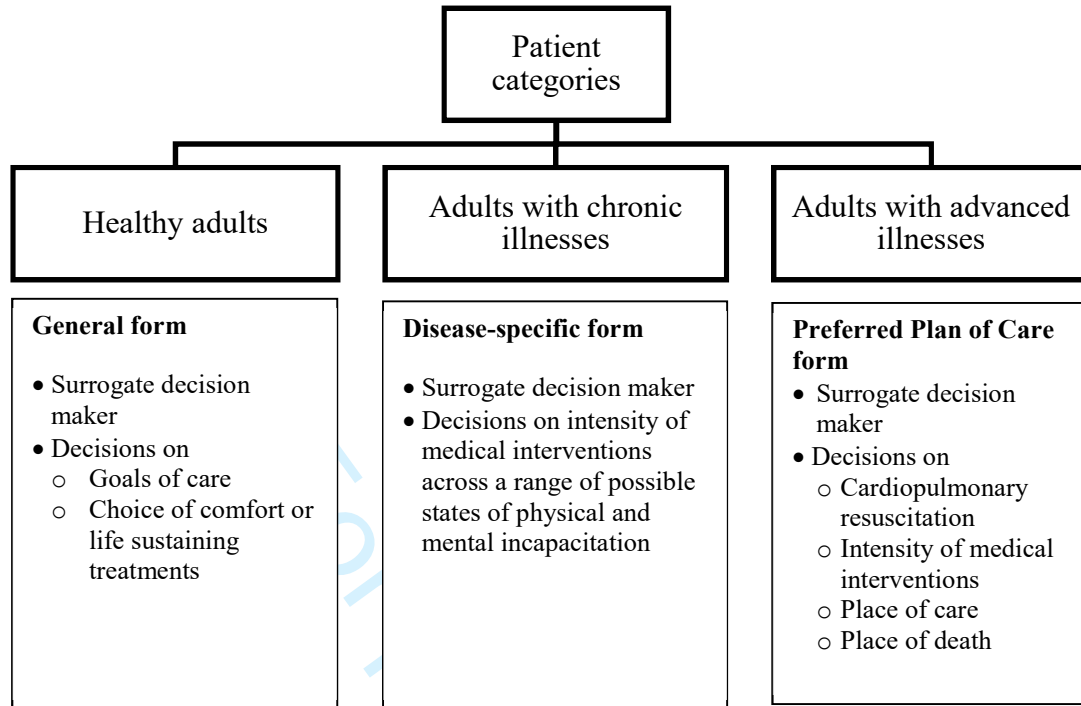

1  
2  
3  
4  
5  
6  
7  
8  
9  
10  
11  
12  
13  
14  
15  
16  
17  
18  
19  
20  
21  
22  
23  
24  
25  
26  
27  
28  
29  
30  
31  
32  
33  
34  
35  
36  
37  
38  
39  
40  
41  
42  
43  
44  
45  
46

## STROBE 2007 (v4) Statement—Checklist of items that should be included in reports of *cross-sectional studies*

| Section/Topic                | Item # | Recommendation                                                                                                                                                                       | Reported on page # |
|------------------------------|--------|--------------------------------------------------------------------------------------------------------------------------------------------------------------------------------------|--------------------|
| <b>Title and abstract</b>    | 1      | (a) Indicate the study's design with a commonly used term in the title or the abstract                                                                                               | 1                  |
|                              |        | (b) Provide in the abstract an informative and balanced summary of what was done and what was found                                                                                  | 3-4                |
| <b>Introduction</b>          |        |                                                                                                                                                                                      |                    |
| Background/rationale         | 2      | Explain the scientific background and rationale for the investigation being reported                                                                                                 | 6-7                |
| Objectives                   | 3      | State specific objectives, including any prespecified hypotheses                                                                                                                     | 7                  |
| <b>Methods</b>               |        |                                                                                                                                                                                      |                    |
| Study design                 | 4      | Present key elements of study design early in the paper                                                                                                                              | 9                  |
| Setting                      | 5      | Describe the setting, locations, and relevant dates, including periods of recruitment, exposure, follow-up, and data collection                                                      | 9                  |
| Participants                 | 6      | (a) Give the eligibility criteria, and the sources and methods of selection of participants                                                                                          | 9                  |
| Variables                    | 7      | Clearly define all outcomes, exposures, predictors, potential confounders, and effect modifiers. Give diagnostic criteria, if applicable                                             | 9-12               |
| Data sources/<br>measurement | 8*     | For each variable of interest, give sources of data and details of methods of assessment (measurement). Describe comparability of assessment methods if there is more than one group | 9-12               |
| Bias                         | 9      | Describe any efforts to address potential sources of bias                                                                                                                            | 21                 |
| Study size                   | 10     | Explain how the study size was arrived at                                                                                                                                            | 9                  |
| Quantitative variables       | 11     | Explain how quantitative variables were handled in the analyses. If applicable, describe which groupings were chosen and why                                                         | 11-12              |
| Statistical methods          | 12     | (a) Describe all statistical methods, including those used to control for confounding                                                                                                | 12                 |
|                              |        | (b) Describe any methods used to examine subgroups and interactions                                                                                                                  | 12                 |
|                              |        | (c) Explain how missing data were addressed                                                                                                                                          | 14                 |
|                              |        | (d) If applicable, describe analytical methods taking account of sampling strategy                                                                                                   | N.A.               |
|                              |        | (e) Describe any sensitivity analyses                                                                                                                                                | N.A.               |
| <b>Results</b>               |        |                                                                                                                                                                                      |                    |

|                          |     |                                                                                                                                                                                                              |       |
|--------------------------|-----|--------------------------------------------------------------------------------------------------------------------------------------------------------------------------------------------------------------|-------|
| Participants             | 13* | (a) Report numbers of individuals at each stage of study—eg numbers potentially eligible, examined for eligibility, confirmed eligible, included in the study, completing follow-up, and analysed            | 12-13 |
|                          |     | (b) Give reasons for non-participation at each stage                                                                                                                                                         | N.A.  |
|                          |     | (c) Consider use of a flow diagram                                                                                                                                                                           | N.A.  |
| Descriptive data         | 14* | (a) Give characteristics of study participants (eg demographic, clinical, social) and information on exposures and potential confounders                                                                     | 13    |
|                          |     | (b) Indicate number of participants with missing data for each variable of interest                                                                                                                          | 13    |
| Outcome data             | 15* | Report numbers of outcome events or summary measures                                                                                                                                                         | 14-15 |
| Main results             | 16  | (a) Give unadjusted estimates and, if applicable, confounder-adjusted estimates and their precision (eg, 95% confidence interval). Make clear which confounders were adjusted for and why they were included | 17    |
|                          |     | (b) Report category boundaries when continuous variables were categorized                                                                                                                                    | 13    |
|                          |     | (c) If relevant, consider translating estimates of relative risk into absolute risk for a meaningful time period                                                                                             | N.A.  |
| Other analyses           | 17  | Report other analyses done—eg analyses of subgroups and interactions, and sensitivity analyses                                                                                                               | 15-17 |
| <b>Discussion</b>        |     |                                                                                                                                                                                                              |       |
| Key results              | 18  | Summarise key results with reference to study objectives                                                                                                                                                     | 17-20 |
| Limitations              | 19  | Discuss limitations of the study, taking into account sources of potential bias or imprecision. Discuss both direction and magnitude of any potential bias                                                   | 21    |
| Interpretation           | 20  | Give a cautious overall interpretation of results considering objectives, limitations, multiplicity of analyses, results from similar studies, and other relevant evidence                                   | 17-21 |
| Generalisability         | 21  | Discuss the generalisability (external validity) of the study results                                                                                                                                        | 21    |
| <b>Other information</b> |     |                                                                                                                                                                                                              |       |
| Funding                  | 22  | Give the source of funding and the role of the funders for the present study and, if applicable, for the original study on which the present article is based                                                | 27    |

\*Give information separately for cases and controls in case-control studies and, if applicable, for exposed and unexposed groups in cohort and cross-sectional studies.

**Note:** An Explanation and Elaboration article discusses each checklist item and gives methodological background and published examples of transparent reporting. The STROBE checklist is best used in conjunction with this article (freely available on the Web sites of PLoS Medicine at <http://www.plosmedicine.org/>, Annals of Internal Medicine at <http://www.annals.org/>, and Epidemiology at <http://www.epidem.com/>). Information on the STROBE Initiative is available at [www.strobe-statement.org](http://www.strobe-statement.org).

# BMJ Open

## A retrospective cohort analysis of real-life decisions about end-of-life care preferences in a Southeast Asian country

|                                 |                                                                                                                                                                                                                                                                                                                                                                                                                                                                                                                                                                                       |
|---------------------------------|---------------------------------------------------------------------------------------------------------------------------------------------------------------------------------------------------------------------------------------------------------------------------------------------------------------------------------------------------------------------------------------------------------------------------------------------------------------------------------------------------------------------------------------------------------------------------------------|
| Journal:                        | <i>BMJ Open</i>                                                                                                                                                                                                                                                                                                                                                                                                                                                                                                                                                                       |
| Manuscript ID                   | bmjopen-2018-024662.R2                                                                                                                                                                                                                                                                                                                                                                                                                                                                                                                                                                |
| Article Type:                   | Research                                                                                                                                                                                                                                                                                                                                                                                                                                                                                                                                                                              |
| Date Submitted by the Author:   | 19-Dec-2018                                                                                                                                                                                                                                                                                                                                                                                                                                                                                                                                                                           |
| Complete List of Authors:       | Tan, Woan Shin; National Healthcare Group, Health Services and Outcomes Research; Nanyang Technological University, Centre for Population Health Sciences<br>Bajpai, Ram; Lee Kong Chian School of Medicine<br>Ho, Andy H Y; Nanyang Technological University, Psychology<br>Low, Chan Kee; Nanyang Technological University<br>Car, Josip; Nanyang Technological University, Health Services and Outcomes Research Programme, Lee Kong Chian School of Medicine; Imperial College London, Global eHealth Unit, Department of Primary Care and Public Health, School of Public Health |
| <b>Primary Subject Heading</b>: | Palliative care                                                                                                                                                                                                                                                                                                                                                                                                                                                                                                                                                                       |
| Secondary Subject Heading:      | Health services research, Patient-centred medicine, Public health                                                                                                                                                                                                                                                                                                                                                                                                                                                                                                                     |
| Keywords:                       | advance care planning, patient preferences, place of care, place of death, cross sectional study                                                                                                                                                                                                                                                                                                                                                                                                                                                                                      |
|                                 |                                                                                                                                                                                                                                                                                                                                                                                                                                                                                                                                                                                       |

SCHOLARONE™  
Manuscripts



1  
2  
3 **A retrospective cohort analysis of real-life decisions about end-of-life care preferences in a**  
4  
5 **Southeast Asian country**  
6  
7  
8  
9

10 Woan Shin Tan<sup>1,2,3</sup>, Ram Bajpai<sup>1</sup>, Andy Hau Yan Ho<sup>1,4,5</sup>, Chan Kee Low<sup>6</sup>, Josip Car<sup>1,7</sup>  
11  
12  
13

14 <sup>1</sup>Centre for Population Health Sciences, Lee Kong Chian School of Medicine, Nanyang  
15 Technological University, Singapore  
16  
17

18 <sup>2</sup>NTU Institute for Health Technologies, Interdisciplinary Graduate School, Nanyang  
19 Technological University, Singapore  
20  
21

22 <sup>3</sup>Health Services and Outcomes Research Department, National Healthcare Group, Singapore  
23  
24

25 <sup>4</sup>Psychology Programme, School of Social Sciences, Nanyang Technological University,  
26 Singapore  
27  
28

29 <sup>5</sup>Palliative Care Centre for Excellence in Research and Education, Singapore  
30  
31

32 <sup>6</sup>Economics Programme, School of Social Sciences, Nanyang Technological University,  
33 Singapore  
34  
35

36 <sup>7</sup>Global eHealth Unit, Department of Primary Care and Public Health, School of Public Health,  
37 Imperial College London, U.K.  
38  
39  
40  
41  
42  
43  
44

45 Corresponding Author:  
46

47 Woan Shin Tan, Centre for Population Health Sciences, Nanyang Technological University,  
48 Clinical Sciences Building, 11 Mandalay Road, Singapore 308232  
49

50 Email: [woan\\_shin\\_tan@nhg.com.sg](mailto:woan_shin_tan@nhg.com.sg)  
51  
52  
53  
54  
55  
56  
57  
58  
59  
60

1  
2  
3 Figures: 1  
4

5 Tables: 5  
6

7  
8 References: 50  
9

10 Word count: 3,654  
11  
12  
13  
14  
15  
16  
17  
18  
19  
20  
21  
22  
23  
24  
25  
26  
27  
28  
29  
30  
31  
32  
33  
34  
35  
36  
37  
38  
39  
40  
41  
42  
43  
44  
45  
46  
47  
48  
49  
50  
51  
52  
53  
54  
55  
56  
57  
58  
59  
60

For peer review only

## ABSTRACT

**Objective** To describe the end-of-life care preferences of individuals, and to examine the influence of age and gender on these preferences.

**Design, setting, and participants** A retrospective cohort study was conducted. Participants included all adults ( $\geq 21$  years old) ( $n=3,380$ ) who had completed a statement of their preferences as part of a national ACP programme in Singapore. Data were extracted from the national and Tan Tock Seng Hospital ACP database.

**Main Measures** End-of-life care preferences were obtained from the ACP document and differentiated by health status (healthy, chronically ill, or diagnosed with advanced illnesses). To analyse the data, descriptive statistics and logistic regression analysis were used.

**Results** Across healthy, and chronically ill patients, the majority did not opt for cardiopulmonary resuscitation (CPR) or other life-sustaining measures. Among individuals with advanced illnesses, 94% preferred not to attempt CPR but 69% still preferred to receive some form of active medical treatment. Approximately 40% chose to be cared for, and to die at home. Age and sex significantly predict preferences in those with advanced illnesses. Older age ( $\geq 75$  years) showed higher odds for home as preferred place of care (odds ratio (OR): 1.52; 95% CI: 1.23-1.89) and place of death (OR: 1.29; 95%CI: 1.03-1.61) and lower odds for CPR (OR: 0.31; 95%CI: 0.18-0.54) and full treatment (OR: 0.32; 95% CI: 0.17-0.62). Being female was associated with lower odds for home as preferred place of care (OR): 0.69; 95% CI: 0.57-0.84) and place of death (OR: 0.70; 95% CI: 0.57-0.85) and higher odds for full treatment (OR: 2.35; 95% CI: 1.18-4.68).

1  
2  
3 **Conclusion** The majority preferred to not proceed with life-sustaining treatments, but there was  
4 still a strong preference to receive some form of limited treatment. Better understanding of end-  
5 of-life care preferences through ACP can better guide end-of-life care programme planning, and  
6 resource allocation decisions.  
7  
8  
9  
10  
11  
12  
13  
14  
15  
16  
17  
18  
19  
20  
21  
22  
23  
24  
25  
26  
27  
28  
29  
30  
31  
32  
33  
34  
35  
36  
37  
38  
39  
40  
41  
42  
43  
44  
45  
46  
47  
48  
49  
50  
51  
52  
53  
54  
55  
56  
57  
58  
59  
60

For peer review only

## ARTICLE SUMMARY

### Strengths and limitations of this study

- Examined real-life end-of-life preferences of individuals across different health states
- Comprehensive coverage of a large sample of patients who received care from seven acute care hospitals, and twelve different social care providers in Singapore
- Examined the association of end-of-life care preferences with age and sex but was unable to examine the correlation with other covariates due to data limitation
- Individuals who voluntarily completed their advance care plans could be less death-avoidant
- Prospective study will allow for gathering of more variables that influence end-of-life care preferences which this study lacks

For peer review only

## INTRODUCTION

Most societies that are experiencing a rapidly ageing population would encounter challenges in providing high quality end-of-life care to its population. In many jurisdictions, through a process of Advance Care Planning (ACP) an individual could designate a health care decision-maker, and specify decisions regarding life-sustaining treatments in the event of decisional incapacitation. Research has found ACP to empower patients with a greater peace of mind (1), improve the level of agreement with regards to end-of-life care between patient and surrogate, reduce decisional conflict (2) and improve their satisfaction with care (3). The likelihood of dying at their preferred place was also higher among individuals who had completed an ACP (4); the transition between acute and terminal care is often smoother (5). ACP was also associated with avoiding or reducing unnecessary life-sustaining treatments (1, 4), increasing the incidence of out-of-hospital and out-of-intensive care, and increasing the probability of dying at home (6-9).

With this perspective, the Singapore government launched a comprehensive national ACP programme, “Living Matters”, in 2011. “Living Matters” is based on the Respecting Choices® programme at the Gundersen Health System in Wisconsin, US. Primarily, the programme aims to systematise the elicitation and documentation of medical and care preferences (10); with a longer-term goal of normalising death and dying conversations in the community (11, 12). Listed amongst populations that are ageing most rapidly in the world, this is a timely effort, as the need to cater for health care, including end-of-life care of the population, is expected to intensify alongside the doubling of the elderly population (13).

1  
2  
3 Surveys have been conducted locally to profile the end-of-life care preferences across different  
4 patients and community-based samples (14-17). However, surveys often require individuals to  
5 respond to a single question about their preferred place of death, based on a hypothetical end-of-  
6 life scenario (18) without having to trade-off against other priorities or account for other than one's  
7 personal concerns. Therefore, choices elicited through a survey could reflect what is preferred  
8 under more "ideal" circumstances. Since an illness impacts the individual biologically as well as  
9 socially (19), the survey process may not mirror real-life decision-making processes well (20).

10  
11  
12 Therefore, in this article, we review the demographics and end-of-life care preferences, as  
13 documented in an Advance Care Plan. Given that end-of-life care preferences could differ across  
14 different health states and over one's life cycle (21), preferences are profiled according to the  
15 health status of those expressing them. Additionally, we also examined the effect of age and gender  
16 on stated preferences.

## 17 18 19 20 21 22 23 24 25 26 27 28 29 30 31 32 33 34 **METHODOLOGY**

### 35 36 37 **Advance Care Planning programme**

38  
39 The "Living Matters" programme comprised three integrated components: (1) provision of patient  
40 educational materials; (2) trained and certified ACP facilitators who assist individuals with ACP;  
41 (3) development of an IT system to enable easily storage, and retrieval of ACP forms (22, 23). The  
42 programme has adopted a staged approach that considers a person's state of health and allows ACP  
43 to be conducted in phases across one's life-time. The conversations can then be individualised  
44 based on one's health status, which is broadly categorised as healthy, diagnosed with complex  
45 chronic illnesses or diagnosed with advanced illnesses.

1  
2  
3 Currently, referral to ACP and the staging of one's health status is largely based on clinical  
4 judgement. Individual clinicians also assess the individual patient's readiness to discuss end-of-  
5 life care issues. In practice, a social care or health care professional may facilitate a conversation  
6 between the patient, and his/her family members to explore his/her values, beliefs and how this  
7 impacts preferences towards medical care at the end-of-life. ACP is not legally binding in  
8 Singapore and therefore, there is no need to engage a lawyer for its discussion or documentation  
9 (24). All participating patients are encouraged to identify a substitute decision-maker (SDM), who  
10 can make health care decisions on their behalf in the event of incapacitation.  
11  
12  
13  
14  
15  
16  
17  
18  
19  
20  
21  
22  
23

24 Different questions and standardised forms apply to each of the three health states (healthy,  
25 chronically ill, with advanced illness) (Figure 1). Individuals identify a substitute decision-maker  
26 and also establish the goals of care relevant to their disease stage. They are intended to update their  
27 decisions as they transit health states. For instance, questions regarding disease-related  
28 complications are not applicable to a healthy individual whereas, for an individual with a poor  
29 prognosis, questions related to disease-related complications may no longer be applicable. Rather,  
30 they may be concerned about care during the terminal phase.  
31  
32  
33  
34  
35  
36  
37  
38  
39  
40  
41

42 End-of-life care preferences are documented in an IT system after obtaining the patient's  
43 concurrence that they accurately reflect their decisions. These recorded preferences are accessible  
44 to different providers across the acute care continuum.  
45  
46  
47  
48  
49  
50  
51  
52  
53  
54  
55  
56  
57  
58  
59  
60



### **Study design and population**

This is a retrospective cohort study that included all individuals aged 21 years and above, who have completed their ACP between January 2011 and December 2015 across all participating acute care hospitals, specialist care centres, and social care providers in Singapore.

### **Patient and public involvement**

Patients were not involved in the design of the study although end-of-life care preferences documented as part of routine clinical care were aggregated and reported in this study. As only anonymised data were analysed, data were not disseminated to the patients.

### **Ethics and consent**

Ethics approval was obtained from the institutional review board of Nanyang Technological University and Domain Specific Review Board of the National Healthcare Group, Singapore. As this is a retrospective database study, written informed consent was waived by both boards.

### **Elicited preferences by health status**

There were three different forms, general, disease specific, and the preferred plan of care (PPC) form, to cater to individuals at different health stages (healthy, chronically ill, advanced illness).

For healthy adults, they were asked about their preferences related to the goals of care when the probability of recovery or survival is low. The choices provided were: “make comfort the goal of my care and do not prolong my life in this condition” or “continue to provide all necessary life-sustaining treatment until outcomes happen to me which I find unacceptable”.

1  
2  
3 For individuals with chronic conditions, the wishes documented in an ACP form specifies  
4 preferences about CPR during cardiac arrest, and decisions about treatment options if they were to  
5 develop serious complications with (i) a low likelihood of survival, or (ii) a high likelihood of  
6 survival but might become immobile and unable to communicate, or (iii) a high likelihood of  
7 survival but might suffer from permanent cognitive impairment. The choice categories include “all  
8 treatment I need to live as long as I can”, “stop all efforts to keep me alive, allow natural death to  
9 happen” and “unsure”.

10  
11  
12 For individuals with advanced illnesses, they were asked about their CPR preferences, decisions  
13 related to medical intervention (comfort, limited additional interventions, full treatment), place of  
14 care, and place of death. Under the current programme, full treatment considers intubation,  
15 mechanical ventilation, and cardioversion. Medical management may also include transfer to  
16 intensive care if indicated. Limited additional interventions include comfort measures and may  
17 also include oral or intravenous medications. While non-invasive ventilation support is acceptable,  
18 endotracheal intubation or long-term life support measures, including admission to intensive care  
19 units are not. Comfort measures include reasonable measures made to offer food and fluids.  
20 Medications, oxygen and other measures may be used as needed for comfort, but it does not include  
21 intubation.

22  
23 For place of medical treatment or care, individuals could opt for the home, hospice, nursing home,  
24 hospital, a trial of treatment in their homes before considering transfer to a hospital or a hospice,  
25 and a trial of treatment in the hospice or nursing home before transfer to a hospital. The  
26 documentation also allowed the individual to indicate “no preferences” and “others”. For place of  
27

1  
2  
3 death, individuals are asked where they would wish to be if they were left with 2-3 days of life.  
4  
5 They could opt for either the home, hospital, hospice or nursing home, and two or more alternatives  
6  
7 such as home or hospital, and home or nursing home or hospital.  
8  
9  
10

### 11 12 **Measures and data extraction**

13  
14 We extracted data on available personal characteristics of patients (age/gender) and preferences  
15  
16 from the national ACP IT system, and the Tan Tock Seng Hospital ACP database. Data fields  
17  
18 related to the nomination of a substitute decision maker(s), preference about the administration of  
19  
20 CPR in the event of a cardiac arrest, and end-of-life care preferences were extracted. In addition,  
21  
22 for patients diagnosed with advanced illnesses, we extracted their preferences for place of care and  
23  
24 death as well.  
25  
26  
27  
28  
29  
30

31 To ascertain whether the individuals were deceased, the data was linked to death-related data from  
32  
33 the National Registry of Birth and Deaths. Every Singaporean resident is issued with a NRIC  
34  
35 number. For this study, a project unique identifying number (PUIN) was generated for each NRIC  
36  
37 by a third-party vendor, who was not involved in the analysis of the data. The PUIN was then used  
38  
39 to link data belonging to each individual person across the datasets.  
40  
41  
42  
43

### 44 **Data analysis**

45  
46 Descriptive statistics were used to characterise the sample and to summarise the basic  
47  
48 characteristics of the data. Frequency distribution tables were created to profile the characteristics  
49  
50 of the study samples and to describe the documented end-of-life care preferences. A chi-square  
51  
52  
53  
54  
55  
56  
57

1  
2  
3 test was used to determine whether a statistically significant relationship exists between two or  
4  
5 more categorical variables.  
6

7  
8 We examined the independent effects of age and gender on four different end-of-life care statement  
9  
10 of preference. We dichotomised the preferences for: (i) cardiopulmonary resuscitation (CPR)  
11  
12 (“attempt” or “do not attempt”), (ii) medical intervention (“treatment” or “comfort measures”),  
13  
14 (iii) preferred place of medical treatment (“home” or “others”) and (iv) preferred place of death  
15  
16 (“home” or “others”). Multivariable logistic regression was performed to investigate the  
17  
18 relationship between age and sex with these preferences. All statistical tests were conducted using  
19  
20 Stata version 12 (25), and a two-sided p-value of 0.05 was set as the level of statistical significance.  
21  
22  
23

## 24 25 **RESULTS**

26  
27 A total of 3,380 completed ACP documents were captured in the databases, with approximately  
28  
29 90% completed in acute hospitals. The patient characteristics can be seen in Table 1. 60% of the  
30  
31 patients were aged 75 years and above, and there was demographic variation across the three types  
32  
33 of ACP, with younger age profiles for those who completed the general and disease-specific forms.  
34  
35 Among all individuals who completed the ACP, 53.2% (1798/3380) were deceased as at 31  
36  
37 December 2015, with the highest share for individuals with advanced illnesses. The overall median  
38  
39 time between ACP completion and death was 7.27 months (95% CI: 6.35-8.18); 63.2% completed  
40  
41 ACP within three months prior to death, 52.9% within six months and 42.3% within 12 months.  
42  
43  
44  
45  
46  
47  
48  
49  
50  
51  
52  
53  
54  
55  
56  
57  
58  
59  
60

**Table 1** Profile of individuals by type of ACP.

| Variable     | Category    | Type of ACP        |                           |                            | Total<br>(n, %)      | p-value |
|--------------|-------------|--------------------|---------------------------|----------------------------|----------------------|---------|
|              |             | Healthy<br>(n, %)  | Chronic illness<br>(n, %) | Advanced<br>illness (n, %) |                      |         |
| Age          | < 55 years  | 77 (11.9)          | 6 (12.2)                  | 142 (5.3)                  | 225 (6.7)            | <0.001  |
|              | 55–64 years | 193 (29.9)         | 14 (28.6)                 | 259 (9.6)                  | 466 (13.8)           |         |
|              | 65–74 years | 203 (31.4)         | 17 (34.7)                 | 445 (16.6)                 | 665 (19.7)           |         |
|              | ≥ 75 years  | 173 (26.8)         | 12 (25.5)                 | 1,839 (68.5)               | 2,024 (59.9)         |         |
| Sex          | Female      | 359 (55.6)         | 19 (38.8)                 | 1,316 (49.0)               | 1,694 (50.1)         | 0.001   |
|              | Male        | 265 (41.0)         | 28 (57.1)                 | 1,335 (49.7)               | 1,628 (48.2)         |         |
|              | Missing     | 22 (3.4)           | 2 (4.1)                   | 34 (1.3)                   | 58 (1.7)             |         |
| Deceased     | Yes         | 57 (8.8)           | 10 (20.4)                 | 1,731 (64.5)               | 1,798 (53.2)         | <0.001  |
|              | No          | 589 (91.2)         | 39 (79.6)                 | 954 (35.5)                 | 1582 (46.8)          |         |
| <b>Total</b> |             | <b>646 (100.0)</b> | <b>49 (100.0)</b>         | <b>2,685 (100.0)</b>       | <b>3,380 (100.0)</b> |         |

### Documented preferences

Data related to preferences for end-of-life care are represented in Table 2. For healthy individuals who had completed the general ACP, 1 in 8 persons indicated a preference for life-sustaining treatment. For individuals who had completed the disease-specific form, close to 1 in 3 opted for CPR and life-sustaining treatment, even if the likelihood of surviving the complications of the illness were low or if they were to lose their ability to move around or communicate. However, only 16.3% opted for full treatment if they were to become mentally incapacitated because of their illness.

For individuals with advanced illnesses (Table 3), 5.7% opted for CPR and 5.1% opted for full medical intervention. The majority preferred the initiation of a limited trial of treatment, which would be continued with comfort measures if there was no clinical improvement. Approximately 43.6% of individuals preferred to receive treatment in their homes, but 77.4% of these individuals would consider being transferred to an acute hospital after a trial of care at home. Only 29.7% stated the hospital as their preferred site of care. For place of death, 40.4% preferred dying at home,

and only 14.1% preferred the hospital. One highlight is that although only 4.1% did not state any preference or were unsure about the place of care, 23% of respondents did not indicate their preferences with regards to the preferred place of death.

**Table 2** End-of-life care preferences in general and disease specific ACP forms.

| <b>Documented preferences</b>                                           | <b>N, %</b>  |
|-------------------------------------------------------------------------|--------------|
| <b>Healthy individuals (n = 646)</b>                                    |              |
| Appointment substitute decision maker                                   | 581 (89.9)   |
| Comfort measures                                                        | 560 (86.7)   |
| Life-sustaining treatments                                              | 79 (12.2)    |
| <b>Individuals with chronic illness (n = 49)</b>                        |              |
| Appointment 1 <sup>st</sup> substitute decision maker                   | 35 (71.4)    |
| Appointment 2 <sup>nd</sup> substitute decision maker                   | 15 (30.6)    |
| Serious complication with low chance of survival                        |              |
| Full treatment                                                          | 16 (32.7)    |
| Stop treatment                                                          | 31 (63.3)    |
| Serious complication with loss of ability to move around or communicate |              |
| Full treatment                                                          | 15 (30.6)    |
| Stop treatment                                                          | 32 (65.3)    |
| Serious complication with mental incapacity                             |              |
| Full treatment                                                          | 8 (16.3)     |
| Stop treatment                                                          | 38 (77.6)    |
| Cardiopulmonary resuscitation                                           |              |
| Attempt                                                                 | 14 (28.6)    |
| Do not attempt                                                          | 19 (38.8)    |
| Do not attempt if doctor believes low survival chances                  | 14 (28.6)    |
| <b>Individuals with advanced illness (n = 2685)</b>                     |              |
| Appointment 1 <sup>st</sup> substitute decision maker                   | 2,526 (94.1) |
| Appointment 2 <sup>nd</sup> substitute decision maker                   | 1,357 (50.5) |
| Cardiopulmonary resuscitation                                           |              |
| Attempt                                                                 | 152 (5.7)    |
| Do not attempt                                                          | 2,511 (93.5) |
| Do not attempt if doctor believes low survival chances                  | 22 (0.8)     |
| Medical intervention                                                    |              |
| Full treatment                                                          | 138 (5.1)    |
| Limited additional interventions                                        | 1,851 (68.9) |
| Comfort measures only                                                   | 677 (25.2)   |
| Unsure                                                                  | 19 (0.7)     |
| Preferred place of medical treatment                                    |              |
| Home                                                                    | 265 (9.8)    |
| Hospital                                                                | 798 (29.7)   |
| Nursing home                                                            | 166 (6.2)    |
| Hospice                                                                 | 131 (4.9)    |

| <b>Documented preferences</b>                                | <b>N, %</b>  |
|--------------------------------------------------------------|--------------|
| Trial of treatment before consider transfer to hospital      |              |
| Home                                                         | 908 (33.8)   |
| Nursing home                                                 | 269 (10.0)   |
| Hospice                                                      | 28 (1.0)     |
| Others (no preference, unsure)                               | 110 (4.1)    |
| Missing                                                      | 10 (0.4)     |
| Preferred place of death                                     |              |
| Patient's home                                               | 1,084 (40.4) |
| Hospital                                                     | 379 (14.1)   |
| Nursing home                                                 | 160 (5.9)    |
| Hospice                                                      | 156 (5.8)    |
| Home or hospital/nursing home/hospice                        | 112 (4.2)    |
| Healthcare institution (hospital or nursing home or hospice) | 177 (6.7)    |
| Others (no preference, unsure)                               | 617 (23.0)   |

ACP: Advance Care Planning; CPR: Cardiopulmonary Resuscitation

### Relationship between patient and SDM

The share of individuals who had appointed a substitute decision-maker varied across the three types of ACP. The rates of nomination were, however, lower for those who completed the general and disease-specific plans. For the PPC, only 8% of individuals did not identify a substitute decision-maker (Table 3). From Table 4.4, 78% of individuals nominated their immediate family (spouse, children, grandchildren) to speak on their behalf if they were incapacitated. Only a small percentage nominated non-related persons. Most ACP discussions also took place in the acute care setting.

**Table 3** Relationship with substitute decision maker.

| <b>Type of substitute</b>                   | <b>Type of ACP</b>    |                               |                                | <b>Total</b>        | <b>p-value</b> |
|---------------------------------------------|-----------------------|-------------------------------|--------------------------------|---------------------|----------------|
|                                             | <b>Healthy (n, %)</b> | <b>Chronic illness (n, %)</b> | <b>Advanced illness (n, %)</b> |                     |                |
| Spouse                                      | 185 (28.6)            | 8 (16.3)                      | 320 (11.9)                     | 513 (15.2)          | <0.001         |
| Child, child-in-law, or grandchild          | 230 (35.6)            | 20 (40.8)                     | 1869 (69.6)                    | 2119 (62.7)         |                |
| Other relatives and friends                 | 136 (21.1)            | 2 (4.1)                       | 266 (9.9)                      | 404 (12.0)          |                |
| Others (including healthcare professionals) | 14 (2.2)              | 1 (2.0)                       | 10 (0.4)                       | 25 (0.7)            |                |
| Missing                                     | 81 (12.5)             | 18 (36.7)                     | 220 (8.2)                      | 319 (9.4)           |                |
| <b>Total</b>                                | <b>646 (100.0)</b>    | <b>49 (100.0)</b>             | <b>2685 (100.0)</b>            | <b>3380 (100.0)</b> |                |

### Relationship between preferred place of care and place of death

Table 4 assessed the relationship between place of care and place of death. The results indicated that there was a high level of agreement and strong correlation in preferences related to being cared for at home and dying at home. Other than this, the place of care is not synonymous with where they would like to die at. Close to 1 in 3 individuals who preferred the hospital as the location of care, had also opted for home as the place of death.

**Table 4** Preferred place of care and preferred place of death.

| Place of Death                        | Place of Care |          |                    |                    |                          |                        |                     | Total |
|---------------------------------------|---------------|----------|--------------------|--------------------|--------------------------|------------------------|---------------------|-------|
|                                       | Home          | Hospital | Hospice            | Nursing home       | Home to Hospital/Hospice | Hospice to NH/Hospital | Others <sup>#</sup> |       |
| Home                                  | 90.9**        | 31.1     | 9.9                | 5.4                | 57.3                     | 12.1                   | 12.7                | 40.4  |
| Hospital                              | 0.8           | 30.3**   | 0.0                | 1.2                | 9.7                      | 13.7                   | 2.7                 | 14.1  |
| Hospice                               | 0.8           | 3.1      | 67.9 <sup>NS</sup> | 0.6                | 2.6                      | 3.3                    | 4.5                 | 5.8   |
| Nursing home                          | 0.4           | 0.4      | 0.0                | 70.5 <sup>NS</sup> | 0.2                      | 12.1*                  | 0.0                 | 6.0   |
| Home or hospital/nursing home/hospice | 1.9           | 3.5      | 1.5                | 0.0                | 8.0**                    | 2.0                    | 2.7                 | 4.4   |
| Healthcare institution                | 0.4           | 4.4      | 4.6                | 6.6*               | 1.2                      | 30.3*                  | 19.1                | 6.6   |
| Others <sup>#</sup>                   | 4.9           | 26.7     | 16.0               | 15.7               | 20.9                     | 26.7                   | 58.2**              | 22.7  |

Note: #: no preferences, unsure; \*p<0.05; \*\*p<0.01

### Relationship between treatment preferences and patient profile

As age and sex were not correlated with preferences for healthy and chronically ill individuals, the results were excluded. Table 5 illustrates the results from a logistic regression to assess the impact of age and sex on the preferences of those with advanced illnesses. Those aged 75 years and above were more likely to not opt for CPR and comfort measures, compared to younger individuals. Care at home or having a trial of care at home was the preferred option for the older age group. Similarly, older people exhibited a stronger likelihood of preferring to die at home. There were no significant gender differences in preferences for CPR. However, there was a higher likelihood of females



opting for full treatment than comfort measures. This is also consistent with the relatively lower odds of choosing home as the site of care and place of death, compared to males.

**Table 5** Multivariable logistic regression of preferences by age and sex with 2,685 subjects who had completed the PPC form.

| Preferred plan of care                      | Age $\geq 75$ vs. Age $< 75$ | Female vs. Male         |
|---------------------------------------------|------------------------------|-------------------------|
|                                             | Adjusted OR<br>(95% CI)      | Adjusted OR<br>(95% CI) |
| <b>CPR</b>                                  |                              |                         |
| Attempt vs. Do not attempt                  | 0.31 (0.18-0.54)             | 1.56 (0.87-2.79)        |
| <b>Medical intervention</b>                 |                              |                         |
| Treatment vs. Comfort measures              | 0.32 (0.17-0.62)             | 2.35 (1.18-4.68)        |
| <b>Preferred place of medical treatment</b> |                              |                         |
| Home & trial at home vs. Others             | 1.52 (1.23-1.89)             | 0.69 (0.57-0.84)        |
| <b>Preferred place of death</b>             |                              |                         |
| Home vs. Others                             | 1.29 (1.03-1.61)             | 0.70 (0.57-0.85)        |

Model includes variables: age and sex

CPR: Cardiopulmonary Resuscitation; OR: Odds Ratio; C.I.: Confidence Interval

## DISCUSSION

This is the first study to have quantified actual decisions about end-of-life care, in a relatively large clinical sample in Singapore. Other published studies have adopted a survey design to elicit preferences as part of research (14, 15, 26). The findings offered insights into decisions made under real-life situations, where the stated preferences were supposed to reflect goals of care of the individual. Singapore stands apart being an Asian country that is strongly influenced by Western culture where the people have a strong desire for independence together with a collectivist mentality (27). The results of this study could therefore be of relevance to other Asian countries that are also experiencing rapid socioeconomic and demographic transitions.

In our study, most individuals nominated their family members to speak on their behalf if they were incapacitated, which is similar to what was observed in other studies (28). Among healthy

1  
2  
3 and chronically ill patients, the majority did not opt for CPR or other life-sustaining measures.  
4  
5 Among those with advanced illness, more than 90% preferred not to attempt CPR, but more than  
6  
7 70% still preferred to receive some form of active medical treatment at the end-of-life, rather than  
8  
9 comfort care. In this national sample, approximately 4 in 10 chose to be cared for and to die at  
10  
11 home. Other Singaporean studies examined the preferences of nursing home residents (29) and  
12  
13 those who received care in a day care centre (16). These studies similarly found that while most  
14  
15 individuals did not opt for CPR, they did express a preference to receive some form of active  
16  
17 treatment (16, 29).  
18  
19  
20  
21  
22  
23

24 In 2014, the Lien Foundation, a Singapore philanthropic house, commissioned a community-based  
25  
26 survey to determine the death attitudes and the level of awareness about hospice and palliative  
27  
28 care. The survey reported that 70% and 77% of the surveyed individuals would prefer to be cared  
29  
30 for, and to die at home respectively (17). Preferences for medical treatment at home, and for home  
31  
32 deaths were significantly lower in our sample. Public opinions often do not coincide with the views  
33  
34 of individuals who are close to the end-of-life (20). Other research, such as those examining health  
35  
36 state valuation, have pointed out the differences between these two groups (30); reflecting different  
37  
38 priorities and changing experiences. The complexity of choices also grows as death draws near  
39  
40 (31). When healthy participants are asked to make decisions regarding hypothetical scenarios  
41  
42 about death and dying, the 'shock' or fear that he or she experiences (32) about potentially dying  
43  
44 in an unfamiliar environment, could sway decisions towards the familiar – meaning the home.  
45  
46 Juxtaposed against other priorities, such as pain and symptom management, and alleviating  
47  
48 caregiver burden, the “cost” of maintaining one’s decision to die at home may also increase (33).  
49  
50  
51  
52  
53  
54 At the same time, the fear of the unfamiliar could decrease over time, as patients increasingly adapt  
55  
56  
57  
58  
59  
60

1  
2  
3 to new living and care arrangements in other settings, such as nursing homes or hospices (34). One  
4  
5 in five individuals have been found to change their preferences over time (18).  
6  
7  
8  
9

10 We also found that, although the preferred place of care and place of death are related, they are  
11  
12 not equivalent. While only a small percentage of individuals did not have strict preferences about  
13  
14 where they are being cared for, almost 1 in 4 individuals expressed that they had no preferred place  
15  
16 of death. Other studies have similarly indicated that these two dimensions are not equivalent,  
17  
18 although healthcare professionals may use them interchangeably in practice (35).  
19  
20  
21  
22  
23

24 In our study, the time between ACP completion and death was 7.3 months. While there is no  
25  
26 objective optimal timing (36), this is relatively shorter than the median times (14 - 37 months)  
27  
28 reported in literature (37, 38). Given that the discussion about preferences should occur before  
29  
30 physical or mental incapacitation, earlier initiation can be beneficial to the patients. At the same  
31  
32 time, it is important to strike a balance because conducting the ACP conversation too early when  
33  
34 preferences are still unstable (39) could lead to unrealistic choices based on hypothesised scenarios  
35  
36 (37). ACP initiation should take into account patient and family receptivity, and ideally, precede  
37  
38 major health deterioration that could lead to decisional incapacitation (40). Different diseases have  
39  
40 different pathways of functional declines (41), which also needs to be considered.  
41  
42  
43  
44  
45  
46

47 In our sample of patients with advanced illnesses, we found that age was positively associated with  
48  
49 preferences to withhold life-sustaining treatments, which was similar to the findings of several  
50  
51 studies (42, 43). We found that individuals older than 75 years were more likely to opt for the  
52  
53 home as the place of care and death; but other studies reported that younger individuals more  
54  
55  
56  
57  
58  
59  
60

1  
2  
3 strongly prefer home as the place of care (44), or that age did not have a significant effect (45).  
4  
5 Cultural differences, in the meaning assigned to the “home” as a place of care and death, or even  
6  
7 the availability of alternative palliative care facilities in different countries, could have resulted in  
8  
9 the mixed evidence. For instance, due to the availability of inpatient palliative care units in Japan,  
10  
11 older individuals had stronger preferences for the patient palliative care unit as the site of care than  
12  
13 home (44). Our finding, that females were less likely to prefer to be cared for and die at home, was  
14  
15 similarly reported in other studies (46, 47). This could reflect the general longer life expectancy of  
16  
17 females compared to males. This reduced likelihood of spousal support at the end-of-life could  
18  
19 make home less preferred as an option (48).  
20  
21  
22  
23  
24  
25

### 26 **Policy & practice implications**

27  
28 Currently, efforts to implement ACP are focused on the elderly and those with advanced illnesses.  
29  
30 Based on the numbers of completed disease-specific forms, the take-up by chronically ill  
31  
32 individuals is very low. While better integration of ACP with chronic disease management efforts  
33  
34 or more rapid expansion of ACP to the outpatient and community settings could assist in improving  
35  
36 coverage, additional resources would concurrently be needed to assist hospitals to expand coverage  
37  
38 to younger adults, and bringing ACP conversations forward in the life-cycle of an individual.  
39  
40 Building community awareness of, and acceptance towards ACP will be crucial.  
41  
42  
43  
44  
45  
46

47 Policies should also consider a range of perspectives and preferences, especially of sub-  
48  
49 populations that they will most immediately affect. Preferences elicited from surveys can be  
50  
51 viewed as an aspirational target that is achievable if practical barriers were eradicated.  
52  
53 Additionally, due to the relatively high proportion of individuals who still preferred hospital as the  
54  
55  
56  
57

1  
2  
3 location of care, policy-makers still need to focus on improving the end-of-life care experience in  
4 formal healthcare institutions, while also expanding home palliative care capacity to cater to those  
5  
6 who preferred home as the first place of care, and place of death.  
7  
8

### 9 10 **Limitations**

11  
12 The sample comprised largely the patients receiving care in the acute care hospitals. As such, the  
13 results may not be generalisable for patients in the community care settings or to other individuals  
14 who have elected not to participate in ACP. Individuals who had completed the ACP  
15 documentation could be less death-avoidant, and therefore, have different preferences compared  
16 to others. We were only able to examine the relationship between preferences and patient age and  
17 sex due to limited availability of data. Other studies (49) have also highlighted the importance of  
18 the family and care context on care preferences. A recent systematic review (50) highlighted the  
19 lack of research evidence on ethnicity and religion, which is also absent from this study. Future  
20 research should explore the influence of these pertinent elements including a closer examination  
21 of the influence of different illnesses (advanced malignancy, end-stage organ failure or neuro-  
22 degenerative diseases) on end-of-life care preferences.  
23  
24  
25  
26  
27  
28  
29  
30  
31  
32  
33  
34  
35  
36  
37

### 38 39 **CONCLUSION**

40  
41 This study identified that most of the individuals in our sample, regardless of health status,  
42 preferred not to proceed with life-sustaining treatments across a spectrum of health scenarios.  
43 However, individuals with advanced illnesses still preferred to receive some form of active  
44 support, e.g. non-invasive ventilation support; or oral and intravenous drug administration. Our  
45 results imply that policies should consider not just home-based end-of-life care, but also actively  
46 focus on the quality of end-of-life care in hospitals, since many individuals still opt for them as the  
47 site of care.  
48  
49  
50  
51  
52  
53  
54  
55  
56  
57

## ACKNOWLEDGEMENTS

We would like to thank Dr. Raymond Ng, Consultant, Department of Palliative Medicine, Tan Tock Seng Hospital for contributing data that were used in the analysis. We would also like to acknowledge Mr. Geronimo Jimenez, NTU; Dr. Sng Ming Keat, NTU; and other colleagues from the Agency for Integrated Care and the Ministry of Health for providing project support.

For peer review only

## References

1. Murray L, Butow PN. Advance care planning in motor neuron disease: A systematic review. *Palliative & supportive care*. 2016;14(4):411-32.
2. Walczak A, Butow PN, Bu S, Clayton JM. A systematic review of evidence for end-of-life communication interventions: Who do they target, how are they structured and do they work? *Patient education and counseling*. 2016;99(1):3-16.
3. Weathers E, O'Caomh R, Cornally N, Fitzgerald C, Kearns T, Coffey A, et al. Advance care planning: A systematic review of randomised controlled trials conducted with older adults. *Maturitas*. 2016;91:101-9.
4. Martin RS, Hayes B, Gregorevic K, Lim WK. The Effects of Advance Care Planning Interventions on Nursing Home Residents: A Systematic Review. *Journal of the American Medical Directors Association*. 2016;17(4):284-93.
5. Oliver DP. End-of-Life Care in U.S. Nursing Homes: A Review of the Evidence. *Journal of the American Medical Directors Association*. 2005;6(3):S20.
6. Detering KM, Hancock AD, Reade MC, Silvester W. The impact of advance care planning on end of life care in elderly patients: randomised controlled trial. *BMJ (Clinical research ed)*. 2010;340:c1345.
7. Ratner E, Norlander L, McSteen K. Death at home following a targeted advance-care planning process at home: the kitchen table discussion. *Journal of the American Geriatrics Society*. 2001;49(6):778-81.
8. Teno JM, Gruneir A, Schwartz Z, Nanda A, Wetle T. Association between advance directives and quality of end-of-life care: a national study. *Journal of the American Geriatrics Society*. 2007;55(2):189-94.
9. Schamp R, Tenkku L. Managed death in a PACE: pathways in present and advance directives. *Journal of the American Medical Directors Association*. 2006;7(6):339-44.
10. Speech by Mr Gan Kim Yong, Minister for Health, at Assisi Hospice's Charity Dinner 2011, Pan Pacific Singapore, 7 November 2011 [press release]. Singapore: Ministry of Health2011.
11. Speech by Mr Gan Kim Yong, Minister for Health, at Singapore Palliative Care Conference at Singapore Polytechnic Convention Centre, 28 June 2014 [press release]. Singapore2014.
12. Speech by Mr Gan Kim Yong, Minister for Health, at the opening of the Asia Pacific Hospice Conference, 27 July 2017 [press release]. Singapore, 27 July 2017 2017.
13. Inter-Ministerial Committee. Report of the Inter-Ministerial Committee on the Ageing Population. 1999.

14. Finkelstein EA, Bilger M, Flynn TN, Malhotra C. Preferences for end-of-life care among community-dwelling older adults and patients with advanced cancer: A discrete choice experiment. *Health Policy*. 2015;119(11):1482-9.
15. Malhotra C, Farooqui MA, Kanavesaran R, Bilger M, Finkelstein E. Comparison of preferences for end-of-life care among patients with advanced cancer and their caregivers: A discrete choice experiment. *Palliative medicine*. 2015;29(9):842-50.
16. Low JA, Ng WC, Yap KB, Chan KM. End-of-life issues--preferences and choices of a group of elderly Chinese subjects attending a day care centre in Singapore. *Annals of the Academy of Medicine, Singapore*. 2000;29(1):50-6.
17. Blackbox Research. Lien Foundation Survey on Death Attitudes 2014 March 1, 2015. Available from: [http://lienfoundation.org/sites/default/files/Death%20survey%20Presser%20Final%20-%20Combined\\_0.pdf](http://lienfoundation.org/sites/default/files/Death%20survey%20Presser%20Final%20-%20Combined_0.pdf).
18. Gomes B, Calanzani N, Gysels M, Hall S, Higginson IJ. Heterogeneity and changes in preferences for dying at home: a systematic review. *BMC Palliative Care*. 2013;12(1):7.
19. Siminoff LA. Incorporating patient and family preferences into evidence-based medicine. *BMC Medical Informatics and Decision Making*. 2013;13(3):S6.
20. Hoare S, Morris ZS, Kelly MP, Kuhn I, Barclay S. Do Patients Want to Die at Home? A Systematic Review of the UK Literature, Focused on Missing Preferences for Place of Death. *PLoS One*. 2015;10(11):e0142723.
21. Ditto PH, Jacobson JA, Smucker WD, Danks JH, Fagerlin A. Context changes choices: a prospective study of the effects of hospitalization on life-sustaining treatment preferences. *Medical decision making : an international journal of the Society for Medical Decision Making*. 2006;26(4):313-22.
22. Moorman SM, Carr D, Kirchhoff KT, Hammes BJ. An assessment of social diffusion in the Respecting Choices advance care planning program. *Death studies*. 2012;36(4):301-22.
23. Chung I, editor *Aging Issues: Advance Care Planning*. Singapore Public Health & Occupational Medicine Conference; 2013; Singapore.
24. How CH, Koh LH. Not that way: Advance Care Planning. *Singapore Medical Journal*. 2015;56(1):19-22.
25. StataCorp. *Stata Statistical Software: Release 12*. College Station, TX: StataCorp LP; 2011.
26. Lee A, Pang WS. Preferred place of death--a local study of cancer patients and their relatives. *Singapore Med J*. 1998;39(10):447-50.



- 1  
2  
3 27. Li J, Ngin PM, Teo AC. Culture and leadership in Singapore: Combination of the East  
4 and the West. 2008.  
5  
6 28. Ang GC, Zhang D, Lim KHJ. Differences in attitudes to end-of-life care among patients,  
7 relatives and healthcare professionals. *Singapore Medical Journal*. 2016;57(1):22-8.  
8  
9 29. Ng CWL, Cheong SK, Govinda Raj A, Teo WSK, Leong IYO. End-of-life care  
10 preferences of nursing home residents: Results of a cross-sectional study. *Palliative medicine*.  
11 2016;30(9):843-53.  
12  
13 30. Stamuli E. Health outcomes in economic evaluation: who should value health? *British*  
14 *medical bulletin*. 2011;97:197-210.  
15  
16 31. Wood C, Salter J. A time and a place: What people want at the end of life. Sue Ryder.  
17 2013.  
18  
19 32. Kahneman D, editor *Determinants of health economic decisions in actual practice: the*  
20 *role of behavioral economics*. ISPOR 10th Annual International Meeting, May 16, 2005,  
21 Washington, DC, USA  
22  
23 2005 Mar-Apr: Value in Health.  
24  
25 33. Townsend J, Frank AO, Fermont D, Dyer S, Karran O, Walgrove A, et al. Terminal  
26 cancer care and patients' preference for place of death: a prospective study. *BMJ (Clinical*  
27 *research ed)*. 1990;301(6749):415-7.  
28  
29 34. Barclay S, Arthur A. Place of death — how much does it matter?: The priority is to  
30 improve end-of-life care in all settings. *The British Journal of General Practice*.  
31 2008;58(549):229-31.  
32  
33 35. Agar M, Currow DC, Shelby-James TM, Plummer J, Sanderson C, Abernethy AP.  
34 Preference for place of care and place of death in palliative care: are these different questions?  
35 *Palliative medicine*. 2008;22(7):787-95.  
36  
37 36. Jimenez G, Tan WS, Virk AK, Low CK, Car J, Yan Ho AH. Overview of Systematic  
38 Reviews of Advance Care Planning: Summary of Evidence and Global Lessons. *Journal of Pain*  
39 *and Symptom Management*. in press.  
40  
41 37. Billings JA, Bernacki R. Strategic targeting of advance care planning interventions: the  
42 Goldilocks phenomenon. *JAMA internal medicine*. 2014;174(4):620-4.  
43  
44 38. Hammes BJ, Rooney BL. Death and end-of-life planning in one midwestern community.  
45 *Archives of Internal Medicine*. 1998;158(4):383-90.  
46  
47 39. Auriemma CL, Nguyen CA, Bronheim R, Kent S, Nadiger S, Pardo D, et al. Stability of  
48 end-of-life preferences: a systematic review of the evidence. *JAMA internal medicine*.  
49 2014;174(7):1085-92.  
50  
51  
52  
53  
54  
55  
56  
57  
58  
59  
60

- 1  
2  
3  
4  
5  
6  
7  
8  
9  
10  
11  
12  
13  
14  
15  
16  
17  
18  
19  
20  
21  
22  
23  
24  
25  
26  
27  
28  
29  
30  
31  
32  
33  
34  
35  
36  
37  
38  
39  
40  
41  
42  
43  
44  
45  
46  
47  
48  
49  
50  
51  
52  
53  
54  
55  
56  
57  
58  
59  
60
40. van der Steen JT, van Soest-Poortvliet MC, Hallie-Heierman M, Onwuteaka-Philipsen BD, Deliëns L, de Boer ME, et al. Factors associated with initiation of advance care planning in dementia: a systematic review. *Journal of Alzheimer's disease : JAD*. 2014;40(3):743-57.
  41. Lunney JR, Lynn J, Foley DJ, Lipson S, Guralnik JM. Patterns of functional decline at the end of life. *Jama*. 2003;289(18):2387-92.
  42. Hamel MB, Teno JM, Goldman L, Lynn J, Davis RB, Galanos AN, et al. Patient age and decisions to withhold life-sustaining treatments from seriously ill, hospitalized adults. SUPPORT Investigators. Study to Understand Prognoses and Preferences for Outcomes and Risks of Treatment. *Annals of internal medicine*. 1999;130(2):116-25.
  43. Hamel MB, Lynn J, Teno JM, Covinsky KE, Wu AW, Galanos A, et al. Age-related differences in care preferences, treatment decisions, and clinical outcomes of seriously ill hospitalized adults: lessons from SUPPORT. *Journal of the American Geriatrics Society*. 2000;48(5 Suppl):S176-82.
  44. Fukui S, Yoshiuchi K, Fujita J, Sawai M, Watanabe M. Japanese people's preference for place of end-of-life care and death: a population-based nationwide survey. *Journal of pain and symptom management*. 2011;42(6):882-92.
  45. Chen CH, Lin YC, Liu LN, Tang ST. Determinants of preference for home death among terminally ill patients with cancer in Taiwan: a cross-sectional survey study. *The journal of nursing research : JNR*. 2014;22(1):37-44.
  46. Fukui S, Fujita J, Tsujimura M, Sumikawa Y, Hayashi Y, Fukui N. Late referrals to home palliative care service affecting death at home in advanced cancer patients in Japan: a nationwide survey. *Annals of oncology : official journal of the European Society for Medical Oncology*. 2011;22(9):2113-20.
  47. Foreman LM, Hunt RW, Luke CG, Roder DM. Factors predictive of preferred place of death in the general population of South Australia. *Palliative medicine*. 2006;20(4):447-53.
  48. Grande GE, Addington-Hall JM, Todd CJ. Place of death and access to home care services: are certain patient groups at a disadvantage? *Social science & medicine (1982)*. 1998;47(5):565-79.
  49. Thomas C, Morris SM, Clark D. Place of death: preferences among cancer patients and their carers. *Social science & medicine (1982)*. 2004;58(12):2431-44.
  50. Etkind SN, Bone AE, Lovell N, Higginson IJ, Murtagh FEM. Influences on Care Preferences of Older People with Advanced Illness: A Systematic Review and Thematic Synthesis. *Journal of the American Geriatrics Society*. 2018;66(5):1031-9.

**Footnotes**

**Contributors** Woan Shin Tan, and Ram Bajpai conceived and designed the study, obtained, analysed, interpreted the data, drafted and revised the article. Chan Kee Low, Andy Hau Yan Ho and Josip Car conceived the study, participated in the interpretation of results, and revised the article. All authors were involved in revising the manuscript critically for important intellectual content and have given final approval of the final version of the manuscript.

**Funding** Woan Shin Tan was funded by the Singapore National Medical Research Council Research (grant number: NMRC/Fellowship/0017/2015) and the Singapore National Healthcare Group. This study was funded by Agency for Integrated Care Singapore (grant number: RCA 16-099), which receives public funding from the Ministry of Health of the Singaporean Government. The funder has played no role in the study design, analysis or interpretation of data.

**Competing interests** None declared.

**Patient consent** None declared.

**Ethics approval** Ethics approval was obtained from the institutional review boards of Nanyang Technological University [Ref: IRB-2016-03-010] and the National Healthcare Group's Domain Specific Review Board [Ref: 2016/00739].

**Provenance and peer review** Not commissioned; externally peer reviewed.

**Data sharing statement** No additional data available.

1  
2  
3 **Figure 1** End-of-life care decisions by health status.  
4  
5  
6  
7  
8  
9  
10  
11  
12  
13  
14  
15  
16  
17  
18  
19  
20  
21  
22  
23  
24  
25  
26  
27  
28  
29  
30  
31  
32  
33  
34  
35  
36  
37  
38  
39  
40  
41  
42  
43  
44  
45  
46  
47  
48  
49  
50  
51  
52  
53  
54  
55  
56  
57  
58  
59  
60

For peer review only

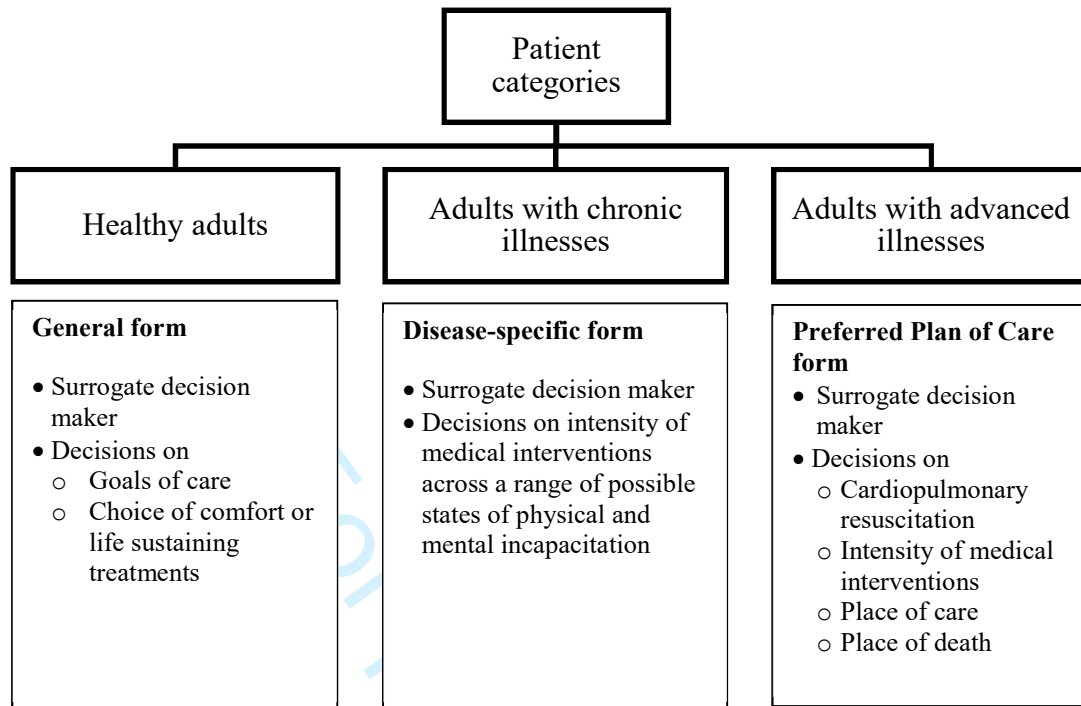

1  
2  
3  
4  
5  
6  
7  
8  
9  
10  
11  
12  
13  
14  
15  
16  
17  
18  
19  
20  
21  
22  
23  
24  
25  
26  
27  
28  
29  
30  
31  
32  
33  
34  
35  
36  
37  
38  
39  
40  
41  
42  
43  
44  
45  
46

**STROBE 2007 (v4) Statement—Checklist of items that should be included in reports of *cross-sectional studies***

| Section/Topic                | Item # | Recommendation                                                                                                                                                                       | Reported on page # |
|------------------------------|--------|--------------------------------------------------------------------------------------------------------------------------------------------------------------------------------------|--------------------|
| <b>Title and abstract</b>    | 1      | (a) Indicate the study's design with a commonly used term in the title or the abstract                                                                                               | 1                  |
|                              |        | (b) Provide in the abstract an informative and balanced summary of what was done and what was found                                                                                  | 3-4                |
| <b>Introduction</b>          |        |                                                                                                                                                                                      |                    |
| Background/rationale         | 2      | Explain the scientific background and rationale for the investigation being reported                                                                                                 | 6-7                |
| Objectives                   | 3      | State specific objectives, including any prespecified hypotheses                                                                                                                     | 7                  |
| <b>Methods</b>               |        |                                                                                                                                                                                      |                    |
| Study design                 | 4      | Present key elements of study design early in the paper                                                                                                                              | 9                  |
| Setting                      | 5      | Describe the setting, locations, and relevant dates, including periods of recruitment, exposure, follow-up, and data collection                                                      | 9                  |
| Participants                 | 6      | (a) Give the eligibility criteria, and the sources and methods of selection of participants                                                                                          | 9                  |
| Variables                    | 7      | Clearly define all outcomes, exposures, predictors, potential confounders, and effect modifiers. Give diagnostic criteria, if applicable                                             | 9-12               |
| Data sources/<br>measurement | 8*     | For each variable of interest, give sources of data and details of methods of assessment (measurement). Describe comparability of assessment methods if there is more than one group | 9-12               |
| Bias                         | 9      | Describe any efforts to address potential sources of bias                                                                                                                            | 21                 |
| Study size                   | 10     | Explain how the study size was arrived at                                                                                                                                            | 9                  |
| Quantitative variables       | 11     | Explain how quantitative variables were handled in the analyses. If applicable, describe which groupings were chosen and why                                                         | 11-12              |
| Statistical methods          | 12     | (a) Describe all statistical methods, including those used to control for confounding                                                                                                | 12                 |
|                              |        | (b) Describe any methods used to examine subgroups and interactions                                                                                                                  | 12                 |
|                              |        | (c) Explain how missing data were addressed                                                                                                                                          | 14                 |
|                              |        | (d) If applicable, describe analytical methods taking account of sampling strategy                                                                                                   | N.A.               |
|                              |        | (e) Describe any sensitivity analyses                                                                                                                                                | N.A.               |
| <b>Results</b>               |        |                                                                                                                                                                                      |                    |

|                          |     |                                                                                                                                                                                                              |       |
|--------------------------|-----|--------------------------------------------------------------------------------------------------------------------------------------------------------------------------------------------------------------|-------|
| Participants             | 13* | (a) Report numbers of individuals at each stage of study—eg numbers potentially eligible, examined for eligibility, confirmed eligible, included in the study, completing follow-up, and analysed            | 12-13 |
|                          |     | (b) Give reasons for non-participation at each stage                                                                                                                                                         | N.A.  |
|                          |     | (c) Consider use of a flow diagram                                                                                                                                                                           | N.A.  |
| Descriptive data         | 14* | (a) Give characteristics of study participants (eg demographic, clinical, social) and information on exposures and potential confounders                                                                     | 13    |
|                          |     | (b) Indicate number of participants with missing data for each variable of interest                                                                                                                          | 13    |
| Outcome data             | 15* | Report numbers of outcome events or summary measures                                                                                                                                                         | 14-15 |
| Main results             | 16  | (a) Give unadjusted estimates and, if applicable, confounder-adjusted estimates and their precision (eg, 95% confidence interval). Make clear which confounders were adjusted for and why they were included | 17    |
|                          |     | (b) Report category boundaries when continuous variables were categorized                                                                                                                                    | 13    |
|                          |     | (c) If relevant, consider translating estimates of relative risk into absolute risk for a meaningful time period                                                                                             | N.A.  |
| Other analyses           | 17  | Report other analyses done—eg analyses of subgroups and interactions, and sensitivity analyses                                                                                                               | 15-17 |
| <b>Discussion</b>        |     |                                                                                                                                                                                                              |       |
| Key results              | 18  | Summarise key results with reference to study objectives                                                                                                                                                     | 17-20 |
| Limitations              | 19  | Discuss limitations of the study, taking into account sources of potential bias or imprecision. Discuss both direction and magnitude of any potential bias                                                   | 21    |
| Interpretation           | 20  | Give a cautious overall interpretation of results considering objectives, limitations, multiplicity of analyses, results from similar studies, and other relevant evidence                                   | 17-21 |
| Generalisability         | 21  | Discuss the generalisability (external validity) of the study results                                                                                                                                        | 21    |
| <b>Other information</b> |     |                                                                                                                                                                                                              |       |
| Funding                  | 22  | Give the source of funding and the role of the funders for the present study and, if applicable, for the original study on which the present article is based                                                | 27    |

\*Give information separately for cases and controls in case-control studies and, if applicable, for exposed and unexposed groups in cohort and cross-sectional studies.

**Note:** An Explanation and Elaboration article discusses each checklist item and gives methodological background and published examples of transparent reporting. The STROBE checklist is best used in conjunction with this article (freely available on the Web sites of PLoS Medicine at <http://www.plosmedicine.org/>, Annals of Internal Medicine at <http://www.annals.org/>, and Epidemiology at <http://www.epidem.com/>). Information on the STROBE Initiative is available at [www.strobe-statement.org](http://www.strobe-statement.org).
